1 *Spodoptera frugiperda* transcriptional response to infestation by  
2 *Steinernema carpocapsae*

3 Fall Armyworm transcriptional response to nematode infestation

4 Louise Huot<sup>1</sup>, Simon George<sup>1</sup>, Pierre-Alain Girard<sup>1</sup>, Dany Severac<sup>2</sup>,  
5 Nicolas Nègre<sup>1,\*</sup> and Bernard Duvic<sup>1,\*</sup>

6 <sup>1</sup> DGIMI, Univ Montpellier, INRA, Montpellier, France

7 <sup>2</sup> MGX, Univ Montpellier, CNRS, INSERM, Montpellier, France

8

9 \* Co-corresponding authors

10 E-mail: [nicolas.negre@umontpellier.fr](mailto:nicolas.negre@umontpellier.fr) (NN) ; [bernard.duvic@umontpellier.fr](mailto:bernard.duvic@umontpellier.fr) (BD)

11

## Abstract

*Steinernema carpocapsae* is an entomopathogenic nematode (EPN) used in biological control of agricultural pest insects. It enters the hemocoel of its host via the intestinal tract and releases its symbiotic bacterium *Xenorhabdus nematophila*, which kills the insect in less than 48 hours. Although several aspects of its interactions with insects have been extensively studied, still little is known about the immune and physiological responses of its different hosts. In order to improve this knowledge, we examined the transcriptional responses to EPN infestation of the fat body, the hemocytes and the midgut in the lepidopteran pest model *Spodoptera frugiperda* (Lepidoptera: Noctuidae). Our results indicate that the tissues poorly respond to the infestation at an early time post-infestation of 8 h, even though the proliferation of the bacterial symbiont within the hemocoel is detected. Only 5 genes are differentially expressed in the fat body of the caterpillars. However, strong transcriptional responses are observed at a later time point of 15 h post-infestation in all three tissues. While few genes are differentially expressed in the midgut, tissue-specific panels of induced metalloprotease inhibitors, immune receptors and antimicrobial peptides together with several uncharacterized genes are up-regulated in the fat body and the hemocytes. In addition, among the most up-regulated genes, we identified new potential immune effectors, unique to Lepidoptera, for which we present evidence of acquisition by Horizontal Gene Transfer from bacteria. Altogether, these results pave the way for further functional studies of the mobilized genes' involvement in the interaction with the EPN.

## Author summary

The Fall Armyworm, *Spodoptera frugiperda*, is a major agricultural pest. The caterpillars cause extensive damage to crops of importance such as corn, rice, sorghum and cotton. Originally from the Americas, it is currently becoming invasive in other parts of the world, first in Africa in 2016, then in India and now in south-east Asia. Programs of biological control against insect pests are increasingly encouraged around the world and include the use of pathogens. Entomopathogenic nematodes such as *Steinernema carpocapsae* are already commercialized as organic pesticides. These nematodes live in the soil and enter the body of their insect preys. Once within the insects, they release their symbiotic bacteria (*Xenorhabdus nematophila* in this case), which infect and kill the host in a few hours. The nematodes can then feed on the dead insects, reproduce and resume their life cycle. It is a major challenge to understand how EPN achieve their pathogenicity as well as how the insects can resist them. Here we provide the foundation for such an interaction between EPN and a Lepidoptera. We analyzed the dynamic of transcriptional response in three insect tissues (midgut, fat body and hemocytes) upon infestation by EPN. Not many studies have been performed genome-wide on such an interaction, and none on a Lepidopteran model of economical importance. Our transcriptomic approach revealed some specificities of the Lepidopteran defense mechanisms. In particular, we discovered a set of genes, acquired in Lepidoptera from bacteria by Horizontal Gene Transfer, that probably encode proteins with antibiotic activity.

## 53 Introduction

54 There is a growing desire in Europe to reduce the use of chemical pesticides on agricultural  
55 land, because of their toxicity for the environment and human health (European Directive  
56 EC91/414). Also, the development of alternative methods for the control of crop pests is  
57 encouraged. These methods include the use of predators and pathogens of insect pests such as  
58 viruses, bacteria, fungi, parasitoid wasps and entomopathogenic nematodes (EPN).

59 EPN of the genus *Steinernema* associated with the symbiotic bacterium *Xenorhabdus* are  
60 among the most widely used and studied biological control agents (1). They pose little threat  
61 to human health and non-target species (2), but are capable of killing a broad spectrum of insect  
62 pests including the moth *Spodoptera frugiperda* (Lepidoptera: Noctuidae)(3, 4). The  
63 infestation cycle of the nematode *Steinernema carpocapsae* has been well described. It starts  
64 with the entry of infective juvenile larvae (IJ) into the insect intestinal tract via the natural  
65 orifices (5). Once the intestinal epithelium is crossed, EPN are found in the hemocoel where  
66 they release their symbiotic bacteria *Xenorhabdus nematophila*. The latter cause the death of  
67 the insect by toxemia and sepsis in less than 48 h. EPN multiply by feeding on the insect tissues,  
68 reassociate with their symbiotic bacteria (6) and then go back to the environment in search for  
69 a new prey (7).

70 Insects live in environments contaminated by microorganisms (bacteria, fungi or viruses)  
71 potentially pathogenic for them. To defend themselves against these aggressors, insects have  
72 developed a powerful and diversified immune system essentially based on innate immunity and  
73 which has been well described in the *Drosophila* model (8). Its main mechanisms and pathways  
74 seem to be conserved in different orders of insects (9-11) even though some insects, such as  
75 *Apis mellifera* or *Acyrtosiphon pisum*, have reduced immune repertoire (12, 13). The first line  
76 of defense are physical barriers, including the cuticle, which covers almost all insects'  
77 interfaces with the environment, and the peritrophic matrix, which replaces the cuticle in the

midgut (14). The cuticle is a thick exoskeleton made of wax, chitin and sclerotized proteins that confers mechanical protection against wounds and invaders (15), while the midgut peritrophic matrix is a thinner network of chitin and proteins that allows the uptake of nutrients but which has a low permeability to microorganisms and toxins (16). The intestinal epithelium can produce several immune molecules such as antimicrobial peptides (AMP) or reactive oxygen species depending on the location (14). Once into the hemolymph, parasites are facing circulating hemocytes, which are the immune blood cells of insects. Hemocytes participate in sclerotization, coagulation as well as in the elimination of small pathogens (bacteria and yeasts) by phagocytosis and nodulation, and of large pathogens (parasitoid wasp eggs, nematodes) by encapsulation (17). Encapsulation, nodulation and coagulation may involve a process of melanisation, which results in the formation of melanin and toxic chemicals that help to sequester and to kill the pathogen (18). Melanisation is activated by an extracellular proteolytic cascade, the pro-phenoloxidase system, following the recognition of microbial determinants or danger signals (19). Finally, the systemic response of insects relies mainly on the massive secretion of AMP by the fat body into the hemolymph, after activation of the IMD and/or Toll pathways. The IMD pathway is primarily activated by peptidoglycan recognition proteins (PGRP) in response to Gram-negative bacteria and the Toll pathway by PGRP and Gram negative binding proteins (GNBP) in response to Gram-positive bacteria and fungi (20). The Toll pathway may also be activated by exogenous proteases from pathogens (21).

Recently, different studies performed in the model insect, *Drosophila melanogaster*, described the responses of this insect to two EPN, *Steinernema carpocapsae* or *Heterorhabditis bacteriophora* (22-24). By the use of transcriptomic approaches on whole larvae or adult flies, the authors showed the overexpression of a large number of immune-related genes involved in defense responses such as coagulation, melanisation and the production of antimicrobial peptides, and in several immune and stress-reponse pathways (Toll, Imd, Jak/Stat or JNK).

In this study, we carried out a transcriptomic analysis of physiological and immune responses of 6<sup>th</sup> instar larvae of *S. frugiperda* fat body, hemocytes and midgut at two time points after infection with the EPN *S. carpocapsae*. At 8 hours after infestation (hpi), we found only 5 genes that were differentially expressed in the fat body. However, at 15 hpi, we detected the significant expression modulation of 271 genes. Few genes were differentially expressed in the midgut whereas strong transcriptional responses were observed in the fat body and the hemocytes. These responses consisted mainly in the overexpression of induced metalloprotease inhibitors (IMPI), immune receptors (mostly PGRP) and AMP, indicating that the fat body as well as the hemocytes produce potent immune responses. Among the most up-regulated genes, we identified a cluster of new potential immune effectors, unique to Lepidoptera, for which we present evidence of acquisition by Horizontal Gene Transfer from bacteria. Finally, we identified a cluster of genes that are overexpressed in all tissues, but whose function is unknown and which are restricted to some noctuid species.

# Results and discussion

## EPN infestation and pathogenicity

To measure how *S. frugiperda* larvae respond to entomopathogenic nematodes (EPN), we performed infestation experiments where 6<sup>th</sup> instar larvae were individually put in contact with either Ringer solution (control experiment) or a solution of EPN in Ringer (infestation condition) at time T = 0 (see Methods and **Fig 1A**). We targeted two time points after infestation based on our previous knowledge of the mode of infestation (6). Eight hours post infestation (hpi), nematodes are supposed to have travelled in the intestinal tract of *S. frugiperda* larvae, crossed the intestinal barrier and started releasing their symbiotic bacteria, *Xenorhabdus nematophila*, within the hemocoel of the caterpillar (6). At 15 hpi, bacteria have multiplied and septicemia is supposed to be reached. In order to verify these assertions, we quantified the *X. nematophila* cells into the hemolymph by CFU counting on a selective medium. In parallel, the survival of the caterpillar to the EPN infestation was monitored for 72 h. Our data show that bacterial growth has already started at 8 hpi, from few bacterial cells released to 10<sup>4</sup> cells/mL of hemolymph and up to 10<sup>6</sup> cells/mL at 15 hpi, which is considered septicemia (**Fig 1B**). When we measured survival of the larvae following infestation, we observed that the first deaths occur at 28 hpi. At 72 hpi, almost all treated larvae were dead (**Fig 1C**) whereas no death was observed in the control experiments.

At 8 hpi and 15 hpi, we removed the larvae from either the control or the infestation plates and dissected three tissues: the midgut (MG), the fat body (FB) and the hemocytes (HC at 15 hpi only). From these tissues, RNA was extracted and processed to perform single end 50 bp Illumina sequencing on three biological replicates (**Fig 1A**). We recovered between 10 and 100 million reads per sample, of which between 50 and 70% align onto the reference transcriptome for *S. frugiperda* (25) (see Methods and **Table 1**). After normalization with DESeq2 (26), we

observed that gene expression datasets cluster by tissue (**S1 Fig**) and that within tissues, condition replicates correlate well with each other.

**Table 1:** RNAseq statistics

| Tissue    | Condition     | Sample | Total reads | Mapped reads | % Mapped reads |
|-----------|---------------|--------|-------------|--------------|----------------|
| Fat body  | Control 8 h   | 3FBn8  | 29 360 077  | 16 556 358   | 56.4           |
|           |               | 5FBn8  | 28 766 960  | 16 431 320   | 57.1           |
|           |               | 1FBn15 | 8 160 217   | 5 760 726    | 70.6           |
|           | Control 15 h  | 3FBn15 | 31 182 081  | 21 405 010   | 68.7           |
|           |               | 5FBn15 | 101 295 028 | 67 865 194   | 67.0           |
|           | Infected 8 h  | 3FBi8  | 18 680 946  | 10 924 308   | 58.5           |
|           |               | 5FBi8  | 27 084 597  | 13 484 897   | 49.8           |
|           |               | 1FBi15 | 38 001 141  | 22 705 073   | 59.8           |
|           | Infected 15 h | 3FBi15 | 25 680 693  | 15 233 458   | 59.3           |
|           |               | 5FBi15 | 17 018 902  | 9 757 977    | 57.3           |
| Midgut    | Control 8 h   | 1MGn8  | 40 762 942  | 26 432 615   | 64.8           |
|           |               | 3MGn8  | 37 701 095  | 24 444 804   | 64.8           |
|           |               | 5MGn8  | 39 108 039  | 23 913 146   | 61.2           |
|           | Control 15 h  | 1MGn15 | 53 104 319  | 33 125 675   | 62.4           |
|           |               | 5MGn15 | 56 673 439  | 35 116 354   | 62.0           |
|           | Infected 8 h  | 1MGi8  | 39 503 925  | 25 273 765   | 64.0           |
|           |               | 3 MGi8 | 45 389 710  | 29 365 492   | 64.7           |
|           |               | 5MGi8  | 33 930 844  | 21 504 374   | 63.4           |
|           | Infected 15 h | 1MGi15 | 46 822 381  | 28 888 031   | 61.7           |
|           |               | 3MGi15 | 40 929 947  | 25 691 178   | 62.8           |
|           |               | 5MGi15 | 42 270 370  | 26 081 101   | 61.7           |
| Hemocytes | Control 15 h  | 1HCn15 | 36 819 698  | 20 610 325   | 56.0           |
|           |               | 3HCn15 | 41 399 767  | 23 008 997   | 55.6           |
|           |               | 5HCn15 | 30 657 274  | 17 119 548   | 55.8           |
|           | Infected 15 h | 1HCi15 | 32 486 507  | 18 101 920   | 55.7           |
|           |               | 3HCi15 | 73 456 056  | 40 045 769   | 54.5           |
|           |               | 5HCi15 | 33 712 769  | 18 309 356   | 54.3           |

*Samples abbreviations:* MG, midgut ; FB, fat body ; HC, hemocytes ; n, naive larvae ; i, infected larvae ; Number at the end (8 or 15) corresponds to the time of tissue extraction after infestation with nematodes.

## Overview of transcriptional response

In MG and FB, at 8 hpi, we detected a very small transcriptional response with only 5



statistically significant differentially expressed (DE) genes in FB and none in MG (**S2 Fig**). From these, 4 genes are overexpressed in response to infestation and are also retrieved overexpressed at later time-points in all 3 tissues (**S3 Fig**). They are annotated in the genome as unknown transcripts.

At 15 hpi, there is a more important transcriptional response with thousands of DE genes in all three tissues at  $\text{padj} < 0.01$  (**S2 Fig**), with in each case, more genes overexpressed than underexpressed. In order to detect the most significant genes responding to EPN infestation at 15 h, we modeled the EPN effect across all datasets and identified 271 DE genes (**Fig 1D**) which we intersected with all previous 1 on 1 comparison per conditions (see **Methods**). Of these, we identified a total of 216 DE genes at 15 hpi in the three different tissues (**Fig 1E**). Most of the response occurred in FB and HC tissues (**Fig 1E, Table 2**) with, again, a vast majority of overexpressed genes (**Fig 1D and 1E, Table 2**).

The data obtained by RNAseq were confirmed by quantitative RT-PCR on a selection of DE genes in the three tissues (**S4 Fig**).

**Table 2:** Differentially expressed genes per condition at 15 hpi

| Tissue                                                                                              | Midgut (MG) | Fat body (FB) | Hemocytes (HC) |
|-----------------------------------------------------------------------------------------------------|-------------|---------------|----------------|
| <b>Differentially expressed genes (<math>\text{padj} &lt; 0.01</math>)</b>                          | 54          | 125           | 189            |
| <b>Overexpressed genes (<math>\text{padj} &lt; 0.01</math>, <math>\text{Log2FC} &gt; 0</math>)</b>  | 41 (75.9 %) | 115 (92.0 %)  | 182 (96.3 %)   |
| <b>Underexpressed genes (<math>\text{padj} &lt; 0.01</math>, <math>\text{Log2FC} &lt; 0</math>)</b> | 13 (24.1 %) | 10 (8.0 %)    | 7 (3.7 %)      |

## Functional response of the Midgut at 15 hpi

The first line of defense against *S. carpocapsae* EPN is the midgut barrier, which is also the main entry point of *Steinernema* nematodes in *S. frugiperda*. This organ is known for its immune activity through the production of reactive oxygen species and anti-microbial peptides

in response to pathogens (27). It is not supposed to be directly confronted to *X. nematophila* and therefore, we hypothesized that the genes, which would be overexpressed specifically in the midgut may identify anti-nematode factors. However, we did not find any DE genes in the midgut at 8 hpi and only 4 genes that were DE specifically in the midgut tissue at 15 hpi, with only 1 being overexpressed and 3 under-expressed (**Fig 2A**). The overexpressed gene encodes a heat-shock protein of the hsp70 family (**S1 Data**). This superfamily of genes is usually upregulated in response to oxidative stress and in the midgut of *Drosophila*, Hsp68 promotes the proliferation of intestinal stem cells, and thus its regeneration (28).

One of the under-expressed genes is an E3 ubiquitin-protein ligase of the Seven In Absentia family (SIAH). The mammalian homologue Siah1 cooperates with SIP (Siah-interacting protein), the F-box protein Ebi and the adaptor protein Skp1, to target beta-catenin, a multifunctional protein that plays an important role in the transduction of Wnt signals and in the intercellular adhesion by linking the cytoplasmic domain of cadherin, for ubiquitination and degradation via a p53-dependent mechanism. Thus, down-regulation of SIAH might increase levels of  $\beta$ -catenin, which favors proliferation of intestinal stem cells in *Drosophila* (14).

The two other under-expressed genes are an ABC family transporter and an NT-C2 domain protein, for which no obvious link to infection or to intestinal homeostasis can be established from the literature.

While we found no evidence of a direct response to EPN specifically by the midgut, we investigated whether this tissue may share a common immune response with the fat body or the hemocytes.

We found nine common DE genes between the midgut and the fat body, which are all overexpressed in both tissues (**Fig 2B**). Of those, three genes have no annotated structure or function. Four other genes with no clear homology have domains that can be associated to

regulation (protein-kinase domain, calcium binding domain, amino-acid transporter and MADF domain transcription factor) (**S1 Data**). Interestingly, we found a cytochrome P450 gene encoding the CYP340L16. CYP genes are usually involved in detoxification of foreign chemicals such as plant xenobiotics and pesticides (29). Finally, one trypsin inhibitor-like cysteine rich domain proteinase inhibitor was also overexpressed. There is no enrichment for a specific molecular function or biological process among those nine genes.

Similarly, 10 genes were found significantly differentially expressed in both the midgut and hemocytes, with 6 of them being overexpressed in both tissues and 4 being under-expressed in MG and upregulated in HC (**Fig 2C**). Of the 6 overexpressed genes, 4 are small solute transporters of the Major Facilitator Superfamily (MFS), 1 is an antennal carboxylesterase and 1 is a proteinase inhibitor (**S1 Data**). No particular function of note has been identified for the 4 genes that were under-expressed in MG but overexpressed in HC, except for *Iap2*, which is an inhibitor of apoptosis and a member of the IMD pathway (30).

From this comparison, it seems likely that the midgut is not specifically mobilized to defend the *S. frugiperda* larvae against EPN infestation. There are few DE genes in this tissue, whether specific or in common with other tissues, and no specific functional pathway can be clearly identified. Rather, some of the genes identified may be reacting to oxidative stress and homeostasis maintenance of the intestinal epithelium, which might be consequences of the host infestation.

### **Specific response of the fat body at 15 hpi**

In insects, the adipocytes that compose the fat body are in direct contact with the hemolymph. The physiological function of this organ is to store energetic reserves, in the form of glycogen and lipids, and release them if needed (31). It is also the main tissue involved in systemic immunity, since it produces AMP during immune challenge (8). We found 14 DE genes

specifically in the fat body, with 12 overexpressed and 2 under-expressed genes. Among the latest are 1 uncharacterized protein and 1 putative transposable element (TE). Among the 12 fat body-specific up-regulated genes, we found one major actor of immunity, the Toll receptor (32), which recognizes the cleaved circulating cytokine Spätzle to induce the production of anti-microbial peptides (33). It is noteworthy that Toll receptor is expressed in all three tissues, but overexpressed in response to EPN in the fat body only (**Fig 3A**). Among the 11 other overexpressed genes, we found one potential receptor of the arrestin family, several enzymes (lipase, carboxypeptidase and a GTPase co-factor), again a MADF-domain transcription factor and a dynein (**S1 Data**).

### **Specific response of the hemocytes at 15 hpi**

In insects, hemocytes are the main actors of the cellular immune responses like phagocytosis or encapsulation (34). They are also involved in other defense mechanisms such as coagulation (35), and melanization (36, 37). In addition, different reports have shown that hemocytes are, as the fat body, capable of synthesis of AMP (38-40). Therefore, we hypothesized that genes specifically induced in the hemocytes may be involved in coagulation and/or melanization along with cellular immune responses.

The largest number of DE genes is found specifically in the hemocytes with 77 genes (**Fig 1E**), of which 74 are overexpressed in response to EPN infestation (**Fig 3B**). No enriched GO categories have been detected in this list. However, we noticed several categories of genes of interest. The most overexpressed gene encodes a serine protease without CLIP-domain (**S1 Data**) that is homologous to hemolymph proteinase 7 (HP7) and 10 (HP10) in *Manduca sexta* (41). In the insect immune system, serine proteases participate in the activation of Toll-dependent response to infection as well as in the PPO-dependent melanization cascade (42). However, many serine-proteases, in particular without CLIP-domains such as HP7 & HP10,

still have unknown function. They are regulated by protease inhibitors, a large family of small peptides, one of which is also found highly induced in our list (**S1 Data**) (log2FoldChange = 8.06). This induction suggests a specific role of HP7/HP10 in the hemocytes activation after infestation by EPN.

The molecular functions we encountered in the hemocytes specific gene list include MFS transporters, ubiquitin-conjugating enzymes, sina-like, antennal esterases, heat-shock proteins and several protein kinases. We also noticed several genes that may play a role in vacuolar trafficking and signaling, with several transmembrane domain proteins. The general molecular function of these genes makes it hard to link them to any biological process.

Surprisingly, we noticed that very few genes linked to immunity were present in this list. In particular, we have not found a deregulation of genes linked to the activation of the PPO pathway besides the above-mentioned serine proteases. The only gene that we could relate to melanization is homologous to the L-dopachrome tautomerase Yellow-f2 that is responsible for the conversion of DOPA into dopamine, a precursor of melanin.

Three transcription factors are also found overexpressed in HC, including Vrilie. Vrilie is known to activate the serine protease Easter that, in turns, cleaves the Spätzle protein that is the ligand of Toll receptor, which we found overexpressed in the fat body (see above). Other genes involved in immunity are Pellino which might be either a negative regulator (43) or an enhancer (44) of the Toll pathway, and IMD which is a member of the IMD pathway.

## **Common response of the Fat Body and the Hemocytes at 15 hpi**

We identified 71 genes differentially expressed upon EPN infestation in both FB and HC tissues (**Fig 1E**), 66 of them being overexpressed in both tissues. The "immunity" ontology is the most enriched GO category (**S5 Fig**). The most overexpressed genes correspond to a battery of anti-microbial peptides (attacins, cecropins, defensins, gloverins and moricins) (**S1 Data**).

We identified by homology a repertoire of 40 AMP in the genome of *S. frugiperda*, classified in 7 different families (25). The majority of AMP production is performed by the FB tissue with members of the attacins, cecropins, gloverins and lebecins strongly overexpressed (**Fig 3C**). These AMP are also significantly overexpressed in the HC but to a lesser extent (**Fig. 3C**). Defensins such as the gallerimycin (45) and Spod-x-tox (46) are overexpressed in both tissues. Remarkably, of the 10 moricins present in *S. frugiperda* genome, only Moricin 10 is strongly overexpressed in both tissues. The diapausin overexpression is less clear with low levels of expression.

Among the most overexpressed genes in both FB and HC tissues, we also identified several members of the peptidoglycan recognition proteins (PGRP) (**S1 Data**), a family of receptors, which are involved in the recognition of pathogens associated molecular patterns (PAMP) and in the subsequent activation of the Toll, Imd and PPO system pathways (19, 20). In the genome of *S. frugiperda*, we identified 10 PGRP (**S6A Fig**) that were named according to *Bombyx mori* nomenclature (9). Upon EPN infestation, PGRP-S2, -S6 and -L3 are overexpressed in both FB and HC, with PGRP-S2 being the highest overexpressed (**S1 Data**). A phylogenetic analysis (**S6B Fig**) shows that PGRP-S2 is closely related to *Drosophila melanogaster* PGRP-SA, which is involved in the induction of the Toll pathway (47). Recently, it has also been reported that a PGRP-SA homolog may be responsible for the activation of the phenoloxidase system in the Chinese tussar moth *Antheraea pernyi* (48).

This overexpression of AMP and PGRP upon EPN infestation has been similarly observed in transcriptomic studies of *Drosophila melanogaster* larvae infested by *Heterorhabditis* sp. or *Steinernema* sp. nematodes (22-24).

Other immunity genes overexpressed in both tissues are implicated in the Toll pathway. This pathway is activated by PAMP recognition proteins or by proteases from pathogens (21, 49). Signal is transduced by an intracellular complex (MyD88/Tube/Pelle) that binds to the

intracytoplasmic domain of Toll and is regulated by Pellino (43, 44). Signal transduction results in the phosphorylation of the ankyrin-repeat containing protein Cactus, which allows its dissociation from the transcription factor Dorsal. This dissociation promotes the translocation of Dorsal to the nucleus where it activates the production of AMP. Several members of this pathway are overexpressed in both FB and HC at 15 hpi, including Pelle, Pellino, and Cactus. Altogether, these results suggest that the Toll pathway is activated in both the fat body and the hemocytes.

We also observed the overexpression of Hdd23 which mediates PPO activation (50) and of 3 putative transcription factors, one of them containing a zinc-finger domain (GATA4-like) known to mediate immune response in *Drosophila* (51).

In addition to immune-related genes, this list contains 7 protease inhibitors. One is a serine protease inhibitor, which may be involved in the regulation of serine proteases cascades, such as the prophenoloxidase activating cascade (42) or the Toll activating cascade (8), while another has homology with a tissue inhibitor of metalloproteases (TIMP). More interestingly, the 5 remaining protease inhibitors belong to the family of inducible metalloprotease inhibitors also called IMPI (52). These 5 IMPI are present as a cluster of genes in the genome of *S. frugiperda* (**Fig 4A**) and their expression is upregulated especially in the hemocytes (**Fig 4B**).

The first IMPI was purified from the hemolymph of the greater wax moth *Galleria mellonella* (53) and further cloned (54). The expression of IMPI, along with antimicrobial peptides/proteins, is induced by metalloproteases released by damage tissue or metalloproteases from pathogens during the humoral immune response of *G. mellonella* (52). It is well known that entomopathogenic bacteria, such as *X. nematophila* or *Bacillus thuringiensis*, establish their pathogenesis by secreting virulence factors among which metalloproteases (55-59). Therefore, we may hypothesize that *S. frugiperda* induces the expression of IMPI to counteract the metalloproteases produced by *X. nematophila*.



## Common response of the Midgut, the Fat body and the Hemocytes at 15 hpi

Finally, we identified 31 genes that are significantly differentially expressed in all three tissues (MG, FB and HC), 25 of them being overexpressed in all tissues (**Fig 1E, S1 Data**). There is no enrichment for a specific molecular function or biological process among these 25 genes and only 3 of them could be related to the caterpillar defenses. They encode the previously cited Hdd23 and Cactus, plus Relish, the transcription factor of the Imd pathway, suggesting that this anti-Gram negative bacteria immune pathway (60) could also take part in the previously described humoral responses.

During the annotation of these genes, we noticed that the 4 most differentially expressed genes had no known function. Three of them were also among the few that were overexpressed in the FB at 8 hpi (**Fig 5A**). We pursued the investigation on the potential origin of these genes, which led us to the identification of 2 previously uncharacterized clusters (**Fig 5B and 5C**).

The first cluster (**Fig 5B**) is composed of 5 genes for which we could not find any homology in sequence databases at the protein nor at the nucleotide level in any other organism than *Spodoptera frugiperda*. However, we could find the whole cluster in the Sf9 and Sf21 cell lines genomes recently published by other labs (61, 62). In addition, after careful exploration of the syntenic regions, this cluster was also identified in the genomes of two other noctuid species, *Spodoptera litura* and *Helicoverpa armigera* (63, 64). Interestingly, the cluster is located close to a gene homolog to the *D. melanogaster* tamozhennic, which has been reported to be involved in Dorsal nuclear translocation (65). Their genomic localization, their organization in cluster, the presence of eukaryotic signal peptides in their predicted amino acid sequences, the fact that they were not only the most differentially expressed genes upon EPN infestation but also the earliest differentially expressed, led us to the hypothesis that they might encode a new class of immune effectors restricted to some noctuid species.



A second intriguing category of genes in this list has a homology to bacterial proteins of unknown function. They are a set of three genes in cluster (**Fig 5C**), localized between several defensin encoding genes. They possess a eukaryotic peptide signal and two introns but their main coding sequence is homologous to genes from the *Lactococcus lactis* bacteria (**S7 Fig**) and shares a homology with a cysteine peptidase domain of the papain family. Among insects, these genes are found only in the genomes of other Lepidoptera (**S7 Fig**). Acquisition of antimicrobial activity from bacteria to eukaryotes by horizontal gene transfer (HGT) has been documented before (66), but not in insects. The genes we discovered by transcriptomic here might represent a Lepidoptera specific expansion of immune competence by acquisition of bacterial genes.

## Conclusions

In this work, we have conducted a time-series analysis of tissue-specific transcriptomic response of the Lepidoptera *Spodoptera frugiperda* larvae to the infestation by the EPN complex *Steinernema carpocapsae/Xenorhabdus nematophila*. We show that at 8 hours after infestation only a few genes are mobilized in the fat body and none in the midgut, despite the presence and amplification of the EPN symbiont *X. nematophila* in the hemocoel. However, we observed a strong response of the larvae at 15 hours post infestation. This response corresponds to a complementary activation of the immune system by the fat body and the hemocytes, resulting in the production of a large repertoire of humoral effectors and receptors. When we compare our data to RNAseq analyses performed by other laboratories, albeit on different interaction systems, we observe a very similar response. For example, Castillo et al. (2015) report an activation of the immune system of *Drosophila melanogaster* larvae by the EPN complex *Heterorhabditis bacteriophora/Photorhabdus luminescens*, represented by several AMPs, several peptidase and protease inhibitors and also Yellow-F. This suggests that all potential hosts possess a conserved ability to fight against EPN complexes. Despite this powerful response, *S. carpocapsae/X. nematophila* complex will be successful regardless of the system they will be confronted with. Anatomies of their host might differ but IJs will find their way inside the midgut and pierce it to enter the hemocoel. There, they will survive the inflammatory response of their host for a sufficient amount of time in order for their released bacterial symbionts to multiply within the insect and kill it (6, 7, 67). It was proposed that the nematodes were able to camouflage themselves from the insect immune system (68). The facts that we found very few genes mobilized at the early time point of 8 hpi and that very few immune-related genes were found mobilized in the midgut at any time point support this idea. However, despite a previous study suggesting that *X. nematophila* could resist to the humoral immune responses by transcriptional down-regulation (69), our study and recent

376 others (24, 70) clearly show that, regardless of the host insect, the immune system is triggered  
 377 and will react to the EPN infestation.  
 378 Nothing in our data suggests a mechanism by which the EPNs bypass the insect defenses at 15  
 379 hpi. Indeed, at this time point, all signaling pathways seem activated in both the fat body and  
 380 the hemocytes and 16 different AMP are produced. Several studies have evidenced a loss of  
 381 hemolymph AMP and antimicrobial activity during infection by the EPN or by *X. nematophila*  
 382 (71, 72). A likely hypothesis might be that these AMP are degraded by *X. nematophila*  
 383 virulence factors, as shown for the *X. nematophila* protease II in *Galleria mellonella* and  
 384 *Pseudaletia unipuncta* (56).

385

## Materials and Methods

### Insect rearing

Corn variant *Spodoptera frugiperda* (Lepidoptera : Noctuidae) larvae were reared on a corn-based artificial diet (73). They were maintained at 23°C +/- 1°C with a photoperiod of 16 h/8 h (light/dark) and a relative humidity of 40% +/- 5%. *Galleria mellonella* (Lepidoptera : pyralidae) larvae were reared on honey and pollen at 28°C in dark.

### Nematode production and storage

Symbiotic *Steinernema carpocapsae* (strain SK27 isolated from Plougastel, France) were renewed on White traps (74) after infestation of the wax moth *Galleria mellonella* last larval stages. They were maintained in aerated Ringer sterile solution with 0.1 % formaldehyde at 8°C for two to four weeks to ensure optimal pathogenicity.

### Infestation

Infestation experiments were processed at 23°C in 12-well culture plates. In each well, one second day sixth instar larva of *S. frugiperda* was placed on a filter paper (Whatman) with artificial corn-based medium. For infested larvae, 150 µL of Ringer sterile solution containing 150 *S. carpocapsae* IJs were introduced in each well. 150 µL of Ringer sterile solution was used for control larvae. To control the nematodes' efficacy, the survival of 12 larvae in both conditions was monitored for 48 hours in each experiment.

### *Xenorhabdus nematophila* quantification

The concentration of *X. nematophila* in *S. frugiperda* hemolymph after infestation was estimated by CFU counting on NBTA (nutrient agar supplemented with 25 mg of bromothymol blue per liter and 40 mg of triphenyltetrazolium chloride per liter) with 15 µg/mL of

erythromycin. For 3 independent experiments and 3 technical replicates, hemolymph was collected by bleeding of 3 caterpillars in 200  $\mu$ L PBS buffer supplemented with phenylthiourea. The volumes of hemolymph were then estimated and serial dilutions of the samples were plated. CFU were counted after 48 h incubation at 28°C and CFU numbers were then reported to the estimated hemolymph volumes in order to calculate the bacterial concentrations. The hemolymph of naive caterpillars was also plated to verify the absence of bacterial growth.

## RNA extraction

*Spodoptera frugiperda* larvae were bled and hemolymph was collected in anti-coagulant buffer (75). Hemocytes were recovered by a short centrifugation at 800 g for 1 min at 4°C. The hemocyte pellet was immediately flash-frozen. Then, larvae were dissected and fat bodies and midguts were extracted, rinsed with PBS, flash-frozen with liquid nitrogen in eppendorf tubes and conserved at -80°C until use. After thawing, 1 mL of Trizol (Life technologies) was added and pooled organs were grounded with a TissueLyzer 85210 Rotator (Qiagen) with one stainless steel bead (3 mm diameter) at 30 Hz for 3 min. Grounded tissues were transferred in new eppendorf tubes and left at room temperature for 5 min then 200  $\mu$ L of chloroform (Interchim) were added. The preparations were homogenized and left at room temperature for 2 min. After a centrifugation at 15,000 g and 4°C for 15 min, the aqueous phase was transferred in new eppendorf tubes. Four hundred  $\mu$ L of 70% ethanol were added and nucleic acid extraction was immediately done with the RNeasy mini kit (Qiagen) according to the manufacturer's instructions. Contaminating DNA was removed by the use of a Turbo DNA-free™ kit (Life Technologies) according to the manufacturer's protocol.

RNA yield and preparation purity were analyzed with a Nanodrop 2000 spectrophotometer (Thermo Scientific) by the measure of the ratios  $A_{260}/A_{280}$  and  $A_{260}/A_{230}$ , respectively. RNA

integrity was verified by agarose gel electrophoresis. RNA preparations were then conserved at - 80°C.

### **Library preparation and Illumina sequencing**

Library preparation and RNA sequencing were conducted by MGX GenomiX (IGF, Montpellier, France). Libraries were prepared with the TruSeq Stranded mRNA Sample preparation kit (Illumina). In brief, after a purification step with oligo(dT) magnetic beads, polyadenylated RNAs were chemically fragmented. A first cDNA strand was synthesized with random primers and SuperScript IV Reverse Transcriptase (Life Technologies) and the second strand was then synthesized. After the addition of single adenine nucleotides, indexed adapters were ligated to the cDNA ends. Adapters-ligated cDNAs were then amplified by PCR and libraries were validated on Fragment Analyzer with a Standard Sensitivity NGS kit (Advanced Analytical Technologies, Inc) and quantified by qPCR with a Light Cycler 480 thermal cycler (Roche Molecular diagnostics).

cDNAs were sequenced with the HiSeq 2500 system (Illumina) on 50 base pairs with a single-end protocol. In brief, libraries were equimolarly pooled and cDNAs were denatured, diluted to 8 pM and injected in the flow cell. The samples were multiplexed by 6 and a PhiX spike control was used. Clusters were generated with a cluster generation kit (Illumina), cDNAs were sequenced by synthesis. Image analysis and base calling were realized with the HiSeq Control Software (Illumina) and the RTA software (Illumina), respectively. After a demultiplexing step, the sequences quality and the absence of contaminant were verified with the FastQC software and the FastQ Screen software, respectively. Raw data were submitted to a Purity Filter (Illumina) to remove overlapping clusters.

## Alignment and counting

For each sample, the reads were pseudoaligned on the *S. frugiperda* reference transcriptome version OGS2.2 (25) using Bowtie2.2.3 (76). Processing of alignment files (.sam files) into sorted .bam files was performed by samtools view and samtools sort commands (77). Read counts for each gene were obtained using samtools idxstats command.

## Differential expression analysis

Differential expression was analyzed with the R package DESeq2 (26). Treated versus untreated samples of the same tissue + time conditions were analyzed using a classical method. An example is shown in **S2 Data** for the analysis of differential expression in the fat body at 8 hpi identifying 5 DE genes at a p-value adjusted of 0.01, equivalent to 1% false discovery rate (**S2 Fig**).

For the global analysis of the EPN effect, we used the Likelihood Ratio test function of DESeq2 as presented in **S3 Data**. At an adjusted p-value of 0.1, this method identified 271 DE genes associated to EPN treatment. We overlapped this list with the pair-wise comparisons above to define tissue-specific or common responses as shown in **Fig 1E**.

Each sub list of DE genes has been analyzed with Blast2GO Pro software (78) to identify homolog sequences by blastx as well as GO categories. By using the full list of *S. frugiperda* OGS2.2 transcripts as reference (25), the enriched GO terms were identified with a Fisher's exact test (one-tailed, FDR < 0.05).

Heatmaps were generated using the heatmap.2 function of the gplots R package such as this presented in **S4 Data** that generated **Fig 1D**.

## qPCR and primers

Differential expression data were verified with control RT-qPCR on selected upregulated and downregulated genes on independently performed EPN infestation experiments. cDNA was synthesized with SuperScript II Reverse Transcriptase (Invitrogen) from 1 µg of RNA sample, according to the manufacturer's protocol.

The primers (**S1 Table**) were designed with the Primer3Web tool (79). Their efficiency was estimated by using serial dilutions of pooled cDNA samples and their specificity was verified with melting curves analysis. Amplification and melting curves were analyzed with the LightCycler 480 software (Roche Molecular diagnostics) version 1.5.0.

RT-qPCR were carried out in triplicate for each biological sample, with the LightCycler 480 SYBR Green I Master kit (Roche Molecular diagnostics). For each couple of sample and primer, 1.25 µL of sample containing 50 ng/µL of cDNA and 1.75 µL of Master mix containing 0.85 µM of primers were distributed in multiwell plates by the Echo 525 liquid handler (Labcyte). After an enzyme activation step of 95°C for 15 min, the amplification was monitored in the LightCycler 480 (Roche) thermal cycler for 45 cycles of 95°C for 5 s, 60°C for 10 s and 72°C for 15 s.

Crossing points were determined using the Second Derivative Maximum method with the LightCycler 480 software (Roche Molecular diagnostics) version 1.5.0. Relative expression quantifications were then processed with the REST 2009 software (80), using the pairwise fixed randomization test with 2,000 permutations. Targets relative levels were normalized to RpL32 housekeeping gene relative levels and the EF1 gene was used as an internal control.



## 496 **Acknowledgments**

497 We thank the quarantine insect platform (PIQ), member of the Vectopole Sud network, for  
498 providing the infrastructure needed for pest insect experimentations. We are also grateful to  
499 Clotilde Gibard and Gaëtan Clabots for maintaining the insect collections of the DGIMI  
500 laboratory in Montpellier.

501

## 502 References

- 503 1. Lacey LA, Grzywacz D, Shapiro-Ilan DI, Frutos R, Brownbridge M, Goettel MS.  
504 Insect pathogens as biological control agents: Back to the future. *Journal of invertebrate*  
505 *pathology*. 2015;132:1-41.
- 506 2. Ehlers RU, Hokkanen HMT. Insect biocontrol with non-endemic entomopathogenic  
507 nematodes (*Steinernema* and *Heterorhabditis* spp): Conclusions and recommendations of a  
508 combined OECD and COST Workshop on Scientific and Regulatory Policy Issues.  
509 *Biocontrol Sci Technol*. 1996;6(3):295-302.
- 510 3. Negrison AS, Garcia MS, Negrison CRCB, Bernardi D, da Silva A. Efficacy of  
511 entomopathogenic nematodes (Nematoda: Rhabditida) and insecticide mixtures to control  
512 *Spodoptera frugiperda* (Smith, 1797) (Lepidoptera: Noctuidae) in corn crops. *Crop Prot*.  
513 2010;29(7):677-83.
- 514 4. Viteri DM, Linares AM, Flores L. Use of the entomopathogenic nematode  
515 *Steinernema carpocapsae* in combination with low-toxicity insecticides to control fall  
516 armyworm (Lepidoptera: Noctuidae) Larvae. *Florida Entomologist*. 2018;101(2):327-9.
- 517 5. Koppenhofer AM, Grewal PS, Fuzy EM. Differences in penetration routes and  
518 establishment rates of four entomopathogenic nematode species into four white grub  
519 species. *Journal of invertebrate pathology*. 2007;94(3):184-95.
- 520 6. Sicard M, Brugirard-Ricaud K, Pages S, Lanois A, Boemare NE, Brehelin M, et al.  
521 Stages of infection during the tripartite interaction between *Xenorhabdus nematophila*, its  
522 nematode vector, and insect hosts. *Applied and environmental microbiology*.  
523 2004;70(11):6473-80.
- 524 7. Dowds BCA, Peters A. Virulence mechanisms. In: Gaugler R, editor.  
525 *Entomopathogenic Nematology*: CABI Publishing; 2002. p. 69-96.
- 526 8. Lemaitre B, Hoffmann JA. The host defense of *Drosophila melanogaster*. *Annual*  
527 *Review of Immunology*. 2007;25(1):697-743.
- 528 9. Tanaka H, Ishibashi J, Fujita K, Nakajima Y, Sagisaka A, Tomimoto K, et al. A  
529 genome-wide analysis of genes and gene families involved in innate immunity of *Bombyx*  
530 *mori*. *Insect biochemistry and molecular biology*. 2008;38(12):1087-110.
- 531 10. Zou Z, Evans JD, Lu ZQ, Zhao PC, Williams M, Sumathipala N, et al. Comparative  
532 genomic analysis of the *Tribolium* immune system. *Genome Biol*. 2007;8(8).
- 533 11. Cao X, He Y, Hu Y, Wang Y, Chen Y-R, Bryant B, et al. The immune signaling  
534 pathways of *Manduca sexta*. *Insect biochemistry and molecular biology*. 2015;62:64-74.
- 535 12. Evans JD, Aronstein K, Chen YP, Hetru C, Imler JL, Jiang H, et al. Immune pathways  
536 and defence mechanisms in honey bees *Apis mellifera*. *Insect molecular biology*.  
537 2006;15(5):645-56.
- 538 13. Gerardo NM, Altincicek B, Anselme C, Atamian H, Barribeau SM, de Vos M, et al.  
539 Immunity and other defenses in pea aphids, *Acyrtosiphon pisum*. *Genome Biol*.  
540 2010;11(2):R21.
- 541 14. Ferrandon D. The complementary facets of epithelial host defenses in the genetic  
542 model organism *Drosophila melanogaster*: from resistance to resilience. *Current opinion in*  
543 *immunology*. 2013;25(1):59-70.
- 544 15. Kristensen N, Chauvin G. Vol. IV: Lepidoptera, moths and butterflies. Morphology,  
545 physiology and development. Integument. In: *Handbook of Zoology*, W. de Gruyter Editor.  
546 2012;2:1-8.
- 547 16. Lehan MJ. Peritrophic matrix structure and function. *Annu Rev Entomol*.  
548 1997;42:525-50.
- 549 17. Strand MR. The insect cellular immune response. *Insect Science*. 2008;15(1):1-14.
- 550 18. Jiravanichpaisal P, Lee BL, Soderhall K. Cell-mediated immunity in arthropods:  
551 hematopoiesis, coagulation, melanization and opsonization. *Immunobiology*.  
552 2006;211(4):213-36.

19. Nakhleh J, El Moussawi L, Osta MA. Chapter Three - The Melanization Response in Insect Immunity. In: Ligoxygakis P, editor. *Advances in Insect Physiology*. 52: Academic Press; 2017. p. 83-109.
20. Ferrandon D, Imler JL, Hetru C, Hoffmann JA. The *Drosophila* systemic immune response: sensing and signalling during bacterial and fungal infections. *Nature reviews immunology*. 2007;7(11):862-74.
21. Issa N, Guillaumot N, Lauret E, Matt N, Schaeffer-Reiss C, Van Dorsselaer A, et al. The circulating protease Persephone is an immune sensor for microbial proteolytic activities upstream of the *Drosophila* Toll pathway. *Mol Cell*. 2018;69(4):539-50 e6.
22. Arefin B, Kucerova L, Dobes P, Markus R, Strnad H, Wang Z, et al. Genome-wide transcriptional analysis of *Drosophila* larvae infected by entomopathogenic nematodes shows involvement of complement, recognition and extracellular matrix proteins. *J Innate Immun*. 2014;6(2):192-204.
23. Castillo JC, Creasy T, Kumari P, Shetty A, Shokal U, Tallon LJ, et al. *Drosophila* anti-nematode and antibacterial immune regulators revealed by RNA-Seq. *BMC genomics*. 2015;16:519.
24. Yadav S, Daugherty S, Shetty AC, Eleftherianos I. RNAseq analysis of the *Drosophila* response to the entomopathogenic nematode *Steinernema*. *G3 (Bethesda)*. 2017;7(6):1955-67.
25. Gouin A, Bretaudeau A, Nam K, Gimenez S, Aury JM, Duvic B, et al. Two genomes of highly polyphagous lepidopteran pests (*Spodoptera frugiperda*, Noctuidae) with different host-plant ranges. *Scientific reports*. 2017;7(1):11816.
26. Love MI, Huber W, Anders S. Moderated estimation of fold change and dispersion for RNA-seq data with DESeq2. *Genome Biol*. 2014;15(12):550.
27. Zhang L, Wang YW, Lu ZQ. Midgut immune responses induced by bacterial infection in the silkworm, *Bombyx mori*. *Journal of Zhejiang University Science B*. 2015;16(10):875-82.
28. Biteau B, Karpac J, Supoyo S, Degennaro M, Lehmann R, Jasper H. Lifespan extension by preserving proliferative homeostasis in *Drosophila*. *PLoS Genet*. 2010;6(10):e1001159.
29. Feyereisen R. Insect P450 enzymes. *Annu Rev Entomol*. 1999;44:507-33.
30. Kleino A, Valanne S, Ulvila J, Kallio J, Myllymaki H, Enwald H, et al. Inhibitor of apoptosis 2 and TAK1-binding protein are components of the *Drosophila* Imd pathway. *The EMBO journal*. 2005;24(19):3423-34.
31. Arrese EL, Soulages JL. Insect fat body: energy, metabolism, and regulation. *Annu Rev Entomol*. 2010;55:207-25.
32. Lemaitre B, Nicolas E, Michaut L, Reichhart JM, Hoffmann JA. The dorsoventral regulatory gene cassette spatzle/Toll/cactus controls the potent antifungal response in *Drosophila* adults. *Cell*. 1996;86(6):973-83.
33. Weber AN, Tauszig-Delamasure S, Hoffmann JA, Lelievre E, Gascan H, Ray KP, et al. Binding of the *Drosophila* cytokine Spatzle to Toll is direct and establishes signaling. *Nature immunology*. 2003;4(8):794-800.
34. Lavine MD, Strand MR. Insect hemocytes and their role in immunity. *Insect biochemistry and molecular biology*. 2002;32(10):1295-309.
35. Bidla G, Lindgren M, Theopold U, Dushay MS. Hemolymph coagulation and phenoloxidase in *Drosophila* larvae. *Developmental and Comparative Immunology*. 2005;29(8):669-79.
36. Kanost MR, Gorman MJ. Phenoloxidases in insect immunity. In: Beckage NE, editor. *Insect Immunology*. San Diego: Academic Press; 2008. p. 69-96.
37. Lu A, Zhang Q, Zhang J, Yang B, Wu K, Xie W, et al. Insect prophenoloxidase: the view beyond immunity. *Frontiers in physiology*. 2014;5:252-.
38. Bartholomay LC, Cho WL, Rocheleau TA, Boyle JP, Beck ET, Fuchs JF, et al. Description of the transcriptomes of immune response-activated hemocytes from the mosquito vectors *Aedes aegypti* and *Armigeres subalbatus*. *Infect Immun*. 2004;72(7):4114-26.

39. Dimopoulos G, Christophides GK, Meister S, Schultz J, White KP, Barillas-Mury C, et al. Genome expression analysis of *Anopheles gambiae*: responses to injury, bacterial challenge, and malaria infection. *Proceedings of the National Academy of Sciences of the United States of America*. 2002;99(13):8814-9.
40. Irving P, Ubeda JM, Doucet D, Troxler L, Lagueux M, Zachary D, et al. New insights into *Drosophila* larval haemocyte functions through genome-wide analysis. *Cell Microbiol*. 2005;7(3):335-50.
41. Jiang H, Wang Y, Gu Y, Guo X, Zou Z, Scholz F, et al. Molecular identification of a bevy of serine proteinases in *Manduca sexta* hemolymph. *Insect biochemistry and molecular biology*. 2005;35(8):931-43.
42. Kanost MR, Jiang H. Clip-domain serine proteases as immune factors in insect hemolymph. *Curr Opin Insect Sci*. 2015;11:47-55.
43. Haghayeghi A, Sarac A, Czerniecki S, Grosshans J, Schock F. Pellino enhances innate immunity in *Drosophila*. *Mech Dev*. 2010;127(5-6):301-7.
44. Ji S, Sun M, Zheng X, Li L, Sun L, Chen D, et al. Cell-surface localization of Pellino antagonizes Toll-mediated innate immune signalling by controlling MyD88 turnover in *Drosophila*. *Nat Commun*. 2014;5:3458.
45. Volkoff AN, Rocher J, d'Alencon E, Bouton M, Landais I, Quesada-Moraga E, et al. Characterization and transcriptional profiles of three *Spodoptera frugiperda* genes encoding cysteine-rich peptides. A new class of defensin-like genes from lepidopteran insects? *Gene*. 2003;319:43-53.
46. Destoumieux-Garzon D, Brehelin M, Bulet P, Boublik Y, Girard PA, Baghdiguian S, et al. *Spodoptera frugiperda* X-tox protein, an immune related defensin rosary, has lost the function of ancestral defensins. *PloS one*. 2009;4(8):e6795.
47. Michel T, Reichhart JM, Hoffmann JA, Royet J. *Drosophila* Toll is activated by Gram-positive bacteria through a circulating peptidoglycan recognition protein. *Nature*. 2001;414(6865):756-9.
48. Zhao S, Wang X, Cai S, Zhang S, Luo H, Wu C, et al. A novel peptidoglycan recognition protein involved in the prophenoloxidase activation system and antimicrobial peptide production in *Antheraea pernyi*. *Dev Comp Immunol*. 2018;86:78-85.
49. Krautz R, Arefin B, Theopold U. Damage signals in the insect immune response. *Front Plant Sci*. 2014;5(342).
50. Qiao C, Li J, Wei XH, Wang JL, Wang YF, Liu XS. SRP gene is required for *Helicoverpa armigera* prophenoloxidase activation and nodulation response. *Dev Comp Immunol*. 2014;44(1):94-9.
51. Senger K, Harris K, Levine M. GATA factors participate in tissue-specific immune responses in *Drosophila* larvae. *Proceedings of the National Academy of Sciences of the United States of America*. 2006;103(43):15957-62.
52. Vilcinskas A, Wedde M. Insect inhibitors of metalloproteinases. *IUBMB life*. 2002;54(6):339-43.
53. Wedde M, Weise C, Kopacek P, Franke P, Vilcinskas A. Purification and characterization of an inducible metalloprotease inhibitor from the hemolymph of greater wax moth larvae, *Galleria mellonella*. *European journal of biochemistry*. 1998;255(3):535-43.
54. Clermont A, Wedde M, Seitz V, Podsiadlowski L, Lenze D, Hummel M, et al. Cloning and expression of an inhibitor of microbial metalloproteinases from insects contributing to innate immunity. *Biochem J*. 2004;382(Pt 1):315-22.
55. Schmidt TM, Bleakley B, Neilson KH. Characterization of an extracellular protease from the insect pathogen *Xenorhabdus luminescens*. *Applied and environmental microbiology*. 1988;54(11):2793-7.
56. Caldas C, Cherqui A, Pereira A, Simões N. Purification and characterization of an extracellular protease from *Xenorhabdus nematophila* involved in insect immunosuppression. *Applied and environmental microbiology*. 2002;68(3):1297-304.
57. Massaoud MK, Marokhazi J, Venekei I. Enzymatic characterization of a serralsin-like metalloprotease from the entomopathogen bacterium, *Xenorhabdus*. *Biochimica et biophysica acta*. 2011;1814(10):1333-9.

58. Ishii K, Adachi T, Hara T, Hamamoto H, Sekimizu K. Identification of a *Serratia marcescens* virulence factor that promotes hemolymph bleeding in the silkworm, *Bombyx mori*. Journal of invertebrate pathology. 2014;117:61-7.
59. Peng D, Lin J, Huang Q, Zheng W, Liu G, Zheng J, et al. A novel metalloproteinase virulence factor is involved in *Bacillus thuringiensis* pathogenesis in nematodes and insects. Environmental microbiology. 2016;18(3):846-62.
60. Myllymaki H, Valanne S, Ramet M. The *Drosophila* imd signaling pathway. Journal of immunology. 2014;192(8):3455-62.
61. Kakumani PK, Malhotra P, Mukherjee SK, Bhatnagar RK. A draft genome assembly of the army worm, *Spodoptera frugiperda*. Genomics. 2014;104(2):134-43.
62. Nandakumar S, Ma H, Khan AS. Whole-genome sequence of the *Spodoptera frugiperda* Sf9 insect cell line. Genome announcements. 2017;5(34).
63. Cheng T, Wu J, Wu Y, Chilukuri RV, Huang L, Yamamoto K, et al. Genomic adaptation to polyphagy and insecticides in a major East Asian noctuid pest. Nature ecology & evolution. 2017;1(11):1747-56.
64. Pearce SL, Clarke DF, East PD, Elfekih S, Gordon KHJ, Jermini LS, et al. Genomic innovations, transcriptional plasticity and gene loss underlying the evolution and divergence of two highly polyphagous and invasive *Helicoverpa* pest species. BMC biology. 2017;15(1):63.
65. Minakhina S, Yang J, Steward R. Tamo selectively modulates nuclear import in *Drosophila*. Genes to Cells. 2003;8(4):299-310.
66. Chou S, Daugherty MD, Peterson SB, Biboy J, Yang Y, Jutras BL, et al. Transferred interbacterial antagonism genes augment eukaryotic innate immune function. Nature. 2015;518(7537):98-101.
67. Aymeric JL, Givaudan A, Duvic B. Imd pathway is involved in the interaction of *Drosophila melanogaster* with the entomopathogenic bacteria, *Xenorhabdus nematophila* and *Photorhabdus luminescens*. Mol Immunol. 2010;47(14):2342-8.
68. Mastore M, Arizza V, Manachini B, Brivio MF. Modulation of immune responses of *Rhynchophorus ferrugineus* (Insecta: Coleoptera) induced by the entomopathogenic nematode *Steinernema carpocapsae* (Nematoda: Rhabditida). Insect Sci. 2015;22(6):748-60.
69. Ji D, Kim Y. An entomopathogenic bacterium, *Xenorhabdus nematophila*, inhibits the expression of an antibacterial peptide, cecropin, of the beet armyworm, *Spodoptera exigua*. Journal of insect physiology. 2004;50(6):489-96.
70. Pena JM, Carrillo MA, Hallem EA. Variation in the susceptibility of *Drosophila* to different entomopathogenic nematodes. Infect Immun. 2015;83(3):1130-8.
71. Binda-Rossetti S, Mastore M, Protasoni M, Brivio MF. Effects of an entomopathogen nematode on the immune response of the insect pest red palm weevil: Focus on the host antimicrobial response. Journal of invertebrate pathology. 2016;133:110-9.
72. Duvic B, Jouan V, Essa N, Girard PA, Pages S, Khattar ZA, et al. Cecropins as a marker of *Spodoptera frugiperda* immunosuppression during entomopathogenic bacterial challenge. Journal of insect physiology. 2012;58(6):881-8.
73. Poitout S. Elevage de plusieurs espèces de Lépidoptères Noctuidae sur milieu artificiel riche et sur milieu artificiel simplifié. Ann Zool Ecol Anim. 1970;2:79-91.
74. White GF. A method for obtaining infective nematode larvae from cultures. Science. 1927;66(1709):302-3.
75. van Sambeek J, Wiesner A. Successful parasitism of locusts by entomopathogenic nematodes is correlated with inhibition of insect phagocytes. Journal of invertebrate pathology. 1999;73(2):154-61.
76. Langmead B, Salzberg SL. Fast gapped-read alignment with Bowtie 2. Nature methods. 2012;9(4):357-9.
77. Li H, Handsaker B, Wysoker A, Fennell T, Ruan J, Homer N, et al. The sequence alignment/map format and SAMtools. Bioinformatics (Oxford, England). 2009;25(16):2078-9.



78. Conesa A, Gotz S, Garcia-Gomez JM, Terol J, Talon M, Robles M. Blast2GO: a universal tool for annotation, visualization and analysis in functional genomics research. *Bioinformatics* (Oxford, England). 2005;21(18):3674-6.
79. Untergasser A, Cutcutache I, Koressaar T, Ye J, Faircloth BC, Remm M, et al. Primer3 - New capabilities and interfaces. *Nucleic acids research*. 2012;40(15):e115.
80. Pfaffl MW, Horgan GW, Dempfle L. Relative expression software tool (REST) for group-wise comparison and statistical analysis of relative expression results in real-time PCR. *Nucleic acids research*. 2002;30(9):e36.
81. Le SQ, Gascuel O. An improved general amino acid replacement matrix. *Mol Biol Evol*. 2008;25(7):1307-20.
82. Felsenstein J. Confidence limits on phylogenies: An approach using the bootstrap. *Evolution; international journal of organic evolution*. 1985;39(4):783-91.

## Figure Legends

### Fig 1: Tissue specific transcriptional response time series of *Spodoptera frugiperda* larvae to EPN infestation

**A:** Overview of the experimental design. In three independent experiments, 9 infested and 9 control larvae from culture plates were dissected at 8 hpi and 15 hpi. Hemocytes, fat bodies and midguts were extracted and pooled by organ for each time and condition. Polyadenylated RNAs were purified from these pools and corresponding cDNA libraries were built. cDNAs were sequenced on a single end by Illumina and RNAseq data were analyzed to identify the genes that are differentially expressed during *Steinernema carpocapsae* infestation.

**B:** Growth of *Xenorhabdus nematophila* following *S. frugiperda* infestation with 150 symbiotic *S. carpocapsae*. At 8 hpi and 15 hpi, the number of CFU per mL of hemolymph was estimated from three independent experiments with three technical replicates (three larvae per technical replicate). Error bars indicate standard errors of the means.

**C:** Survival curve. Larvae were infested with 150 nematobacterial IJ. Data represent means  $\pm$  SEs of four independent experiments, each containing 12 larvae.

**D:** EPN effect significant gene response. This heatmap shows z-score of expression variation across all RNAseq samples (red being overexpressed and blue under-expressed) for 271 genes with significant variations to EPN infestation.

**E:** Venn diagram showing the tissue specificity of the EPN responsive genes at 15 hpi. The response can be overexpression (Up:U) or under-expression (Down:D). For example, there are 71 genes varying significantly upon EPN infestation in both the fat body (FB) and the hemocytes (HC). Of these, 66 are up-regulated in both tissues (UU), 3 are down-regulated in both tissues (DD) and 2 are down-regulated in FB and up-regulated in HC (DU). By convention, the order of the U and D letters represent respectively MG, FB and HC tissues.

## **Fig 2: Midgut Associated Response**

Heatmaps of differential expression (in log2FoldChange - green, under-expression, red, overexpression according to values in **S1 Data**) across all experimental conditions of genes found significantly differentially expressed **A**: specifically in the MG at 15 hpi (MG15 - 4 genes) **B**: common to MG15 and FB15 (9 genes) and **C**: common to MG15 and HC15 (10 genes).

## **Fig 3: Fat body and hemocytes associated responses**

As in **Fig 2**, heatmaps of differential expression for genes **A**: specific to FB15 (14 genes), **B**: specific to HC15 (77 genes) and **C**: common to FB15 and HC15 (71 genes).

## **Fig 4: IMPI**

**A**: WebApollo viewer showing the annotation of inducible metalloprotease inhibitors genes in cluster on the scaffold\_1741 in the genome of *Spodoptera frugiperda*. **B**: As in **Fig 2**, heatmap of differential expression for the identified IMPI genes.

## **Fig 5: Common tissues**

**A**: As in **Fig 2 and 3**, heatmap of differential expression for the 31 genes common to MG15, FB15 and HC15. **B**: WebApollo viewer showing the annotation of unknown genes in cluster on the scaffold\_520. **C**: WebApollo viewer showing the annotation of clustered genes of bacterial origin within a defensin cluster.

## **S1 Table: Primers sequences and genes**

## **S1 Data: Differentially Expressed (DE) genes at 15 hpi**



This table presents the genes that are found differentially expressed upon EPN infestation at 15 hpi. The baseMean column represents the DESeq2 normalized mean expression levels of a particular gene across all experiments. The log2FoldChange and padj columns provided are given by the DESeq2 'results' command from pair-wise comparisons between (Midgut: MG, Fat Body: FB, Hemocytes: HC). On the right hand of the table, we present the best blastp homolog of each gene as well as our manual annotation of each gene based on this homology and protein domain analyses or on previous annotation (25)(in bold). Genes have been grouped by tissues where the differential expression false discovery rate (padj) was less than 0.01.

**S2 Data: Script used for the analysis of differential expression in the fat body at 8 hpi.**

**S3 Data: Script for global analysis of the EPN effect.**

**S4 Data: Heatmaps were generated using the heatmap.2 function of the gplots R package such as below that generated Fig 1D.**

**S1 Fig: Dataset quality control**

**A:** Heatmap of pair-wise correlation between all RNAseq samples. Hierarchical clustering of samples shows the grouping of experiments mostly by tissues then by time-point and by condition. **B:** Principal Component analysis of RNAseq samples showing the grouping of experiments mostly by tissue then by time-point and by condition.

**S2 Fig: DESeq2 analysis**

MA plots showing the log2FoldChange in function of mean expression (measured in reads coverage) of total *S. frugiperda* transcripts in a pairwise DESeq2 analysis of EPN vs PBS in

every Tissue\*Time-point conditions. Indicated on each plot is the number of genes significantly overexpressed (red box) or under-expressed (blue box) upon EPN infestation. For experiments at 15 hpi, the total number of DE genes is also indicated on the right side of the plot.

### **S3 Fig: DE genes in fat body at 8 hpi**

At 8 hpi, 5 genes are significantly differentially expressed in the fat body (FB08). This heatmap of log2FoldChange shows that the 4 unknown genes significantly overexpressed in the FB08 condition are also overexpressed at 15 hpi in all 3 tissues. On the right hand side, this table indicates the DESeq2 results for these genes, showing that the 4 overexpressed genes are of unknown function and correspond to the gene cluster presented in **Fig 5B**.

### **S4 Fig: Validation of RNAseq data using quantitative RT-PCR**

Selected genes were analyzed by quantitative PCR using RNA samples from tissues of naïve or infected larvae. The relative expression level (ratio infected/naïve larvae) is shown as log2FoldChange mean from 3 independent experiments.

### **S5 Fig: Fat Body and Hemocytes Gene Ontology enrichment**

The DE genes common to FB and HC at 15 hpi (**Fig 3C**) show an enrichment of Gene Ontology terms associated to immunity. The same analysis conducted on the other gene lists, in particular the 77 genes associated to HC15, did not produce significant GO term enrichments.

### **S6 Fig: Structures and phylogeny of *Spodoptera frugiperda* peptidoglycan recognition proteins**

**A:** Structures of *SyPGRP*. In red, signal peptide and in blue, transmembrane domain. **B:** The phylogeny of 95 PGRP domain amino acid sequences was determined by using the Maximum Likelihood method (81) in MEGA7 (82). The bootstrap consensus tree was built from 100 replicates and branches corresponding to partitions reproduced in less than 50% bootstrap replicates were collapsed. Initial tree(s) for the heuristic search were obtained automatically by applying Neighbor-Join and BioNJ algorithms to a matrix of pairwise distances estimated using a JTT model, and then selecting the topology with superior log likelihood value. Branches colors: green, Lepidopteran (Bm: *Bombyx mori*, Dp: *Danaus plexippus*, Hm: *Heliconius melpomene*, Px: *Papilio xuthus*, Sf: *Spodoptera frugiperda*), bleu, Dipteran (Aa: *Aedes aegypti*, Ag: *Anopheles gambiae*, Dm: *Drosophila melanogaster*) and orange, Hymenopteran (Am: *Apis mellifera*, Nv: *Nasonia vitripennis*).

#### **S7 Fig: Phylogenetic analysis of genes from bacterial origin**

The 100 first best hits after blastp on nr NCBI were retrieved and the phylogenetic tree was constructed using the method described as in **S6 Fig**. Sequences are grouped in two main clades, one with bacteria only and the second with Lepidoptera only.

Fig 1

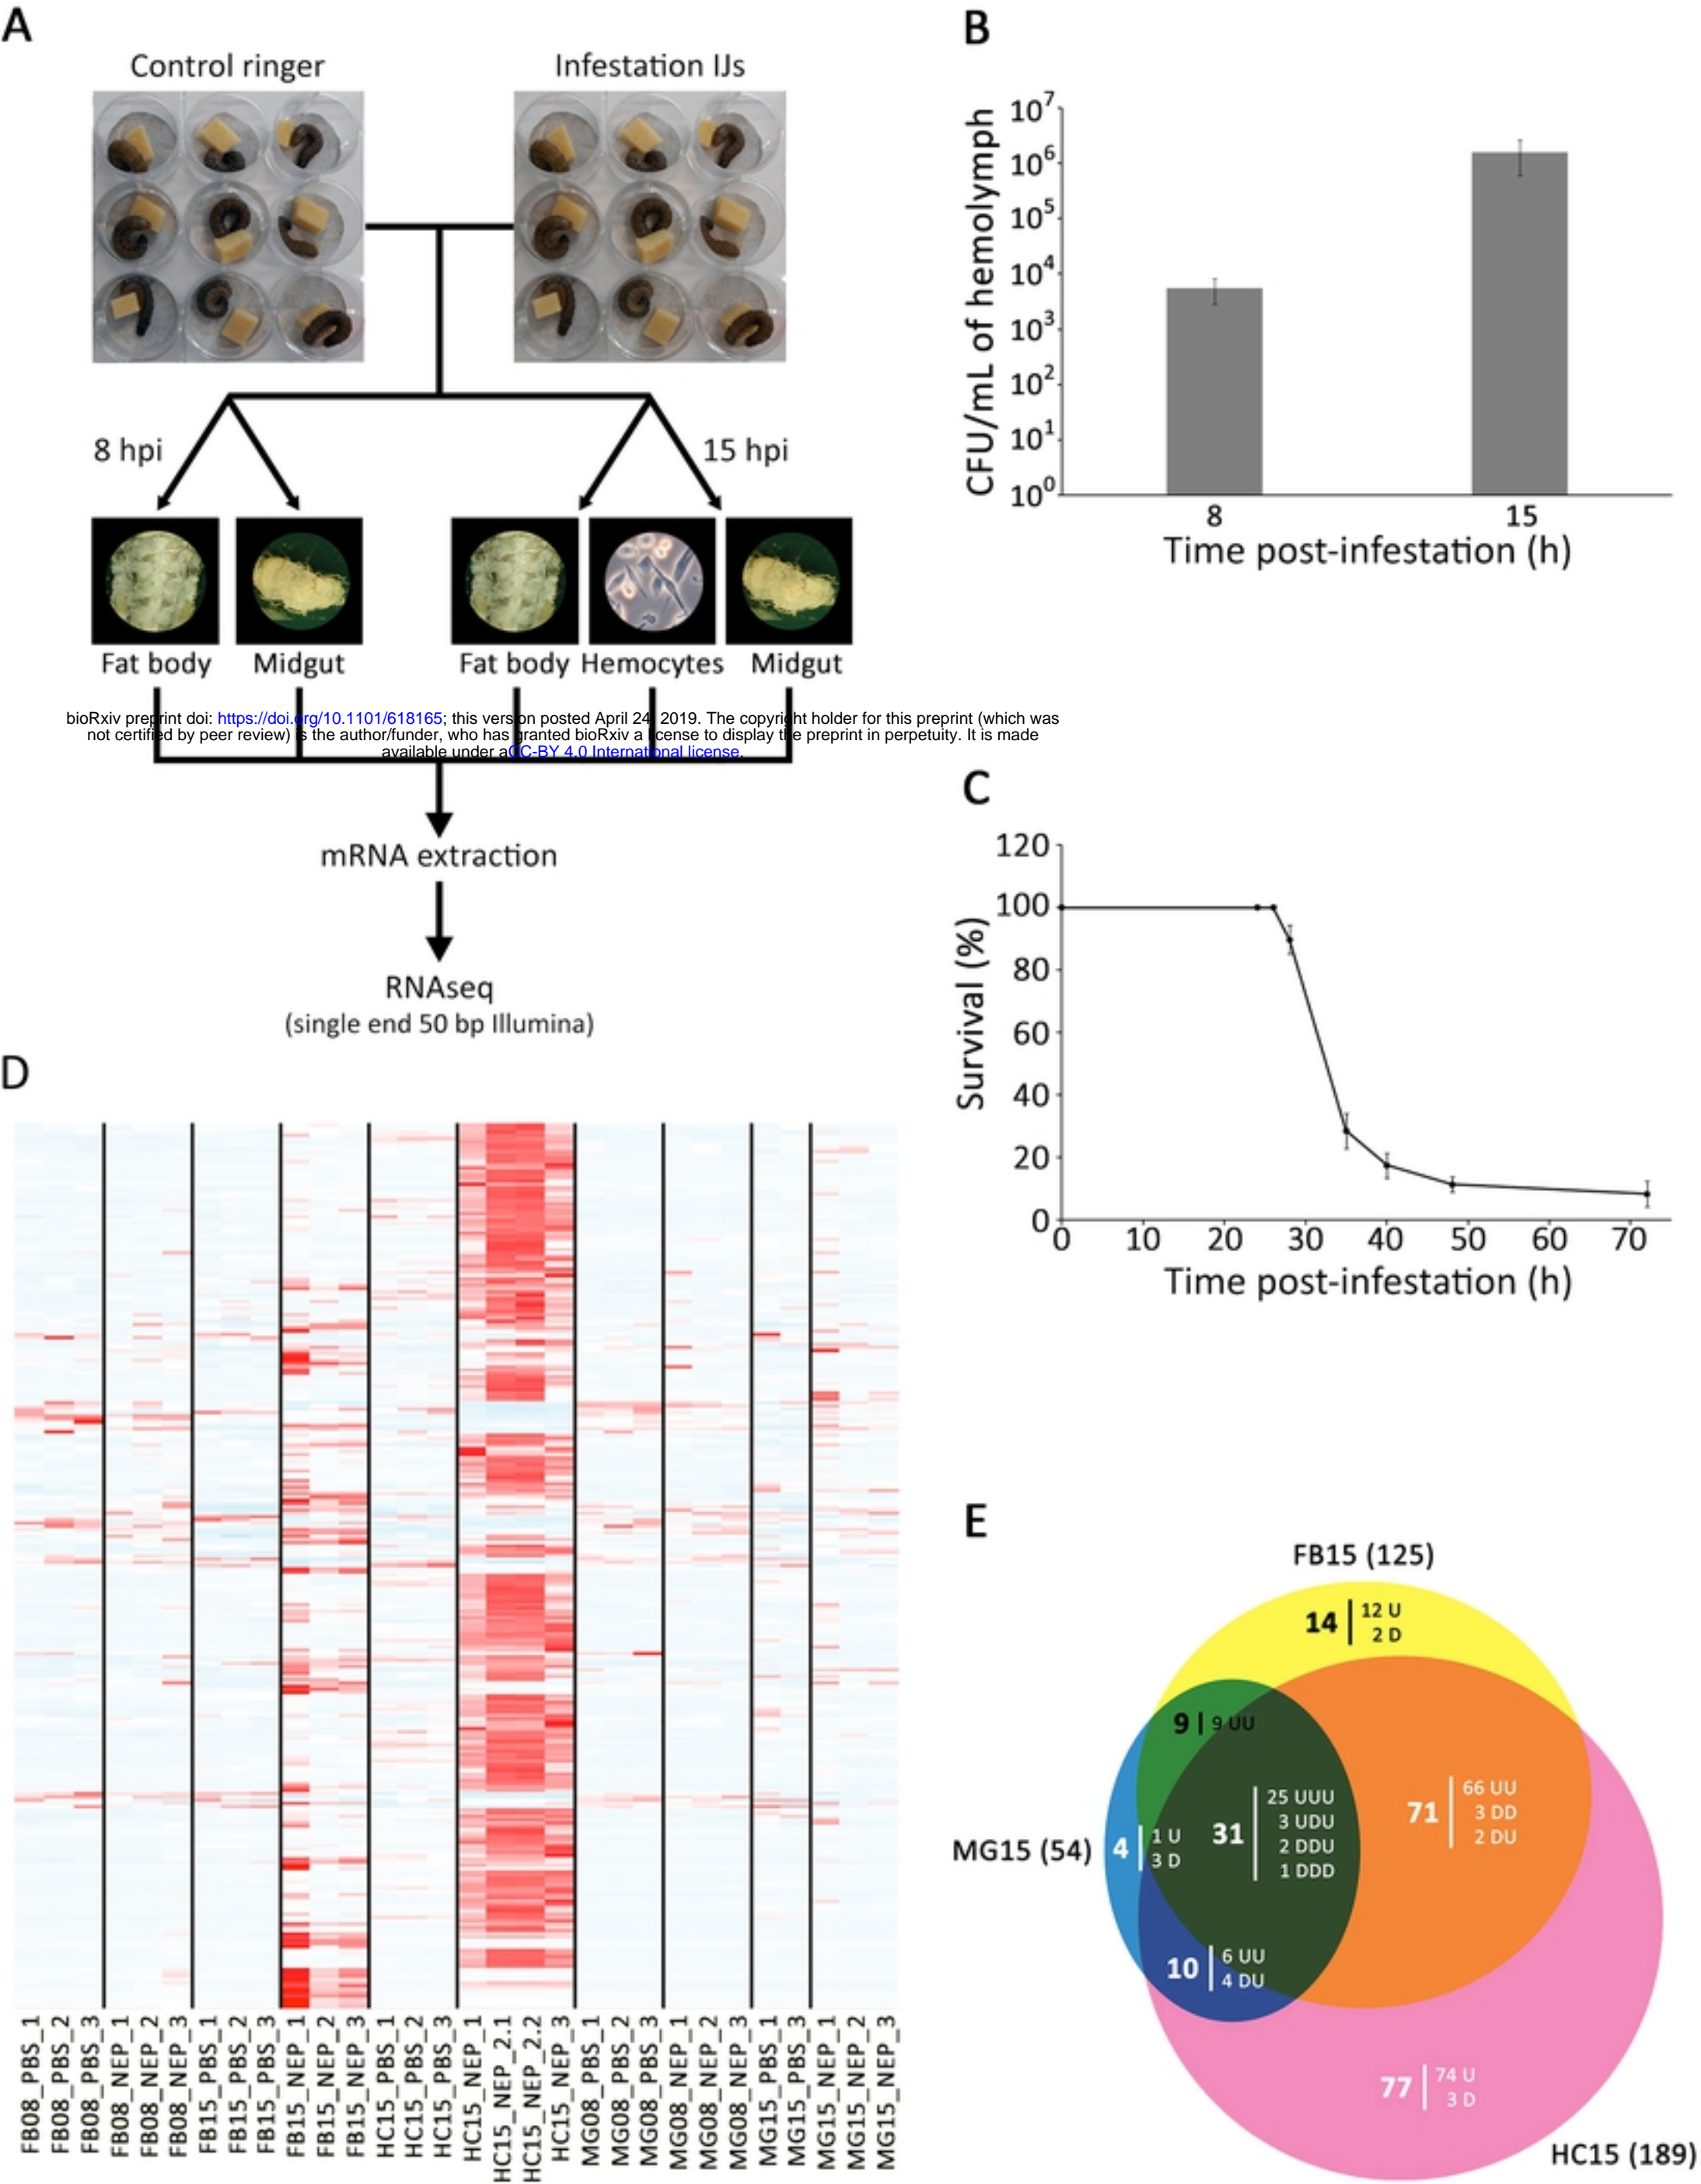

Figure 1

Fig 2

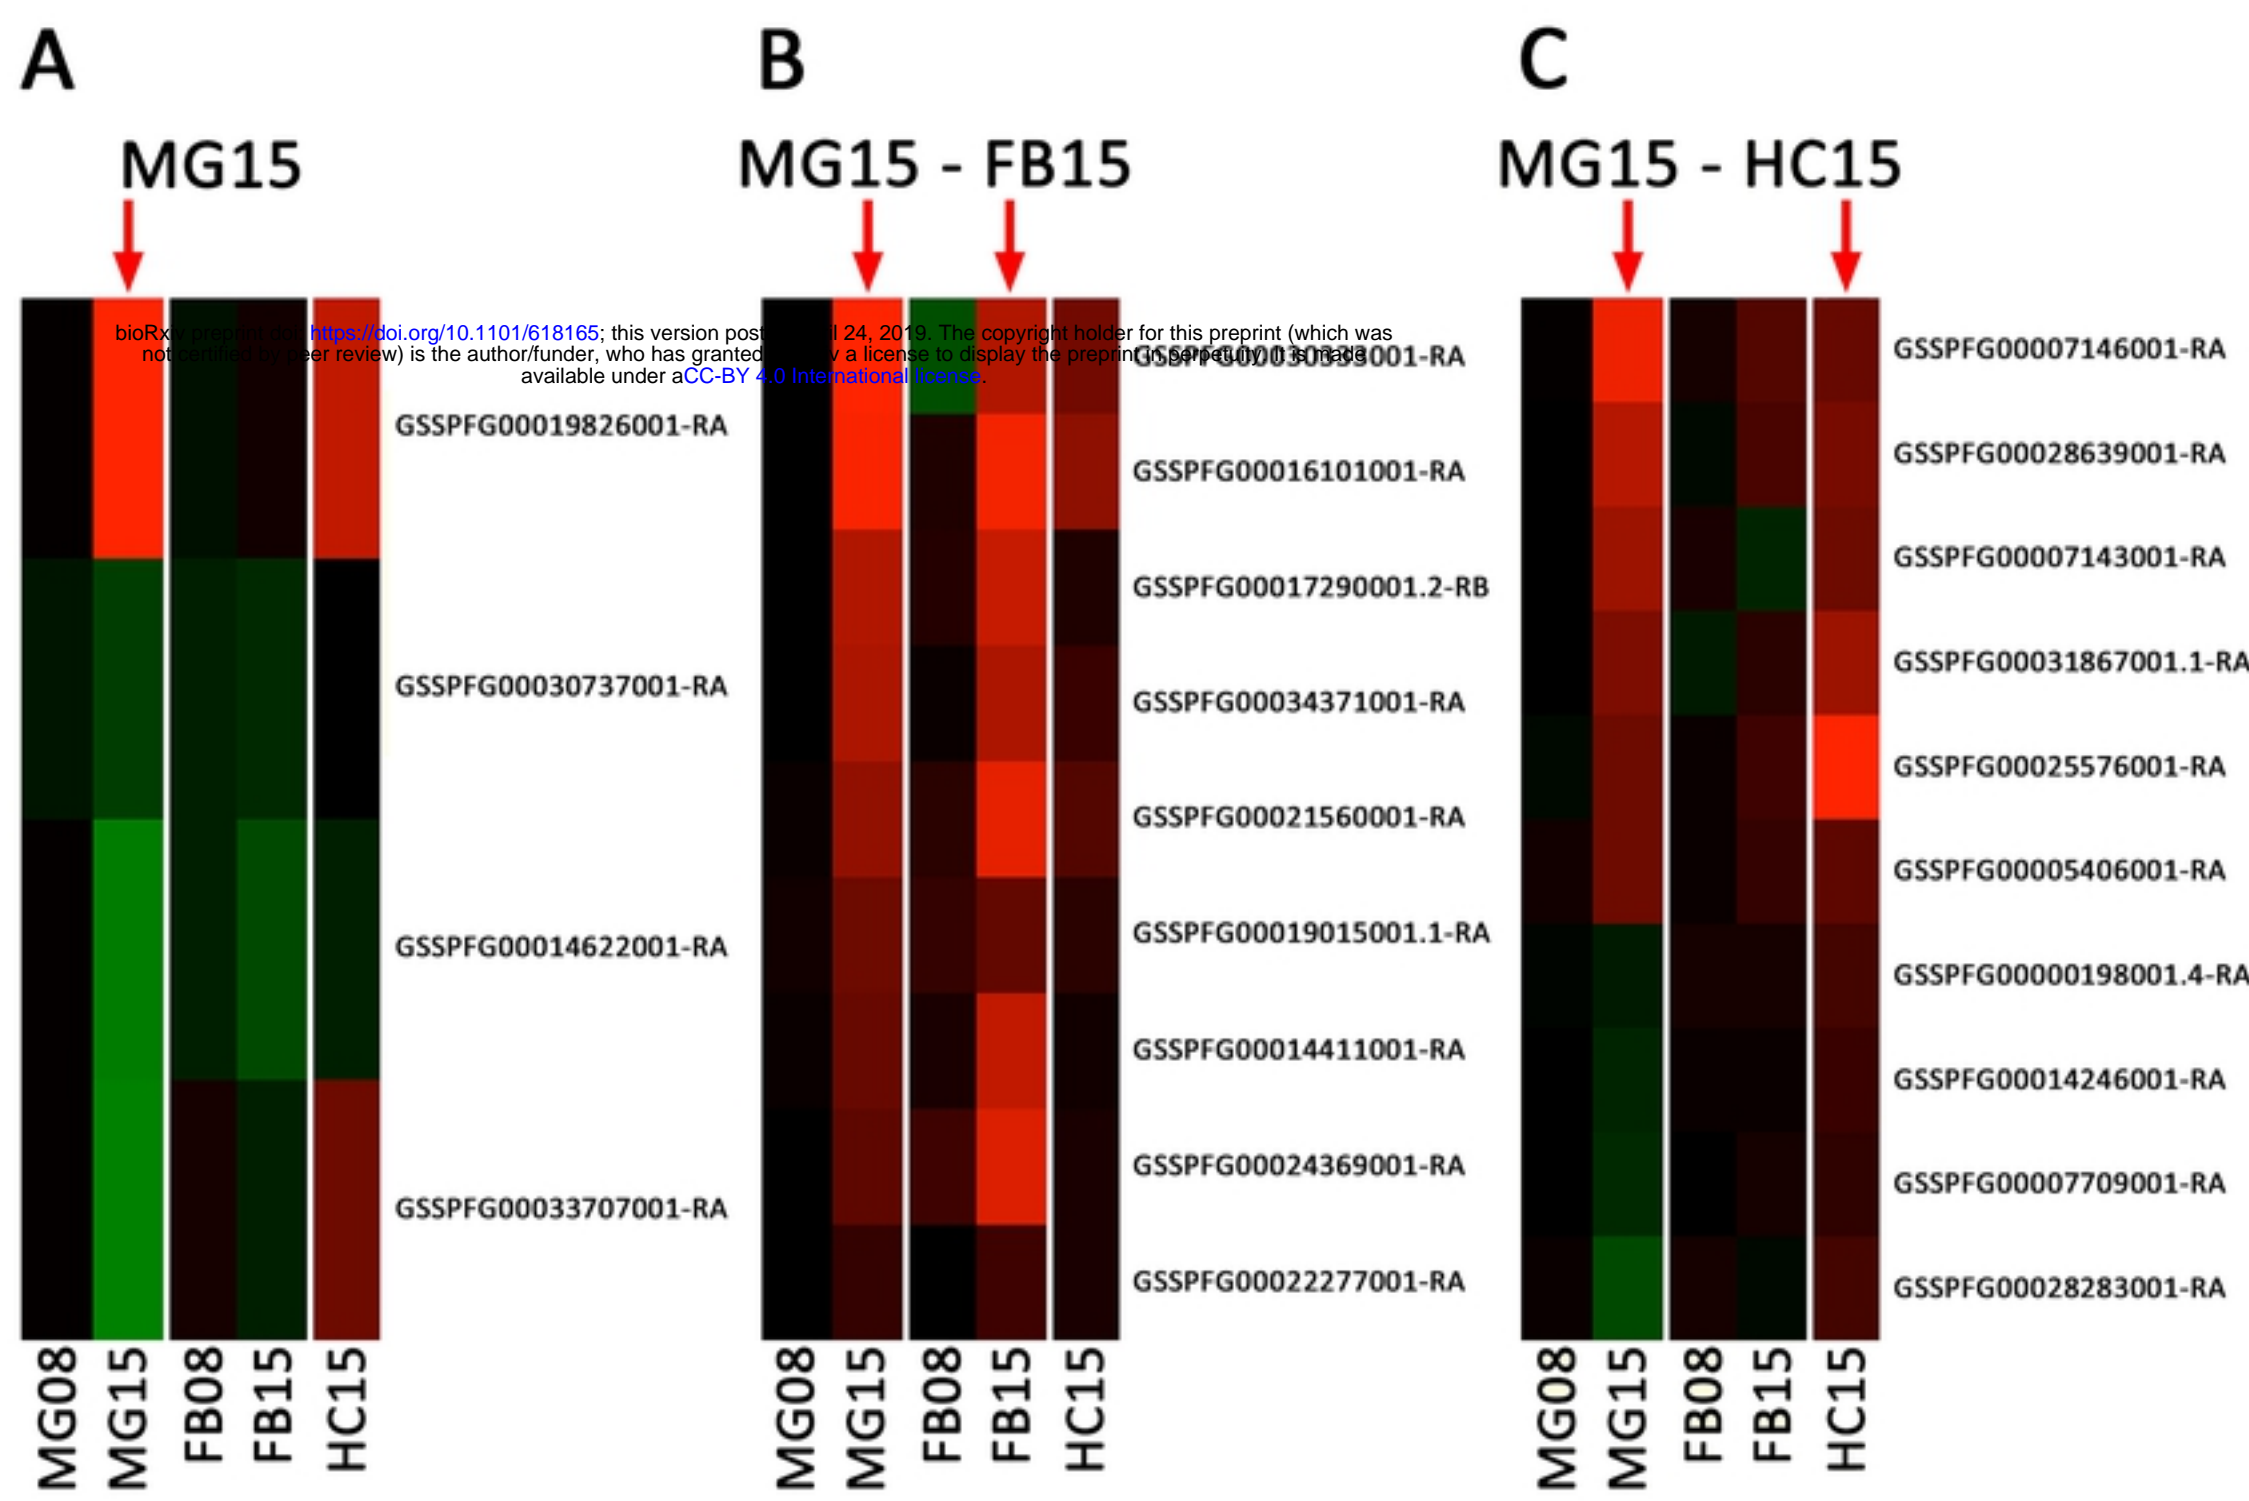

Figure 2



Fig 3

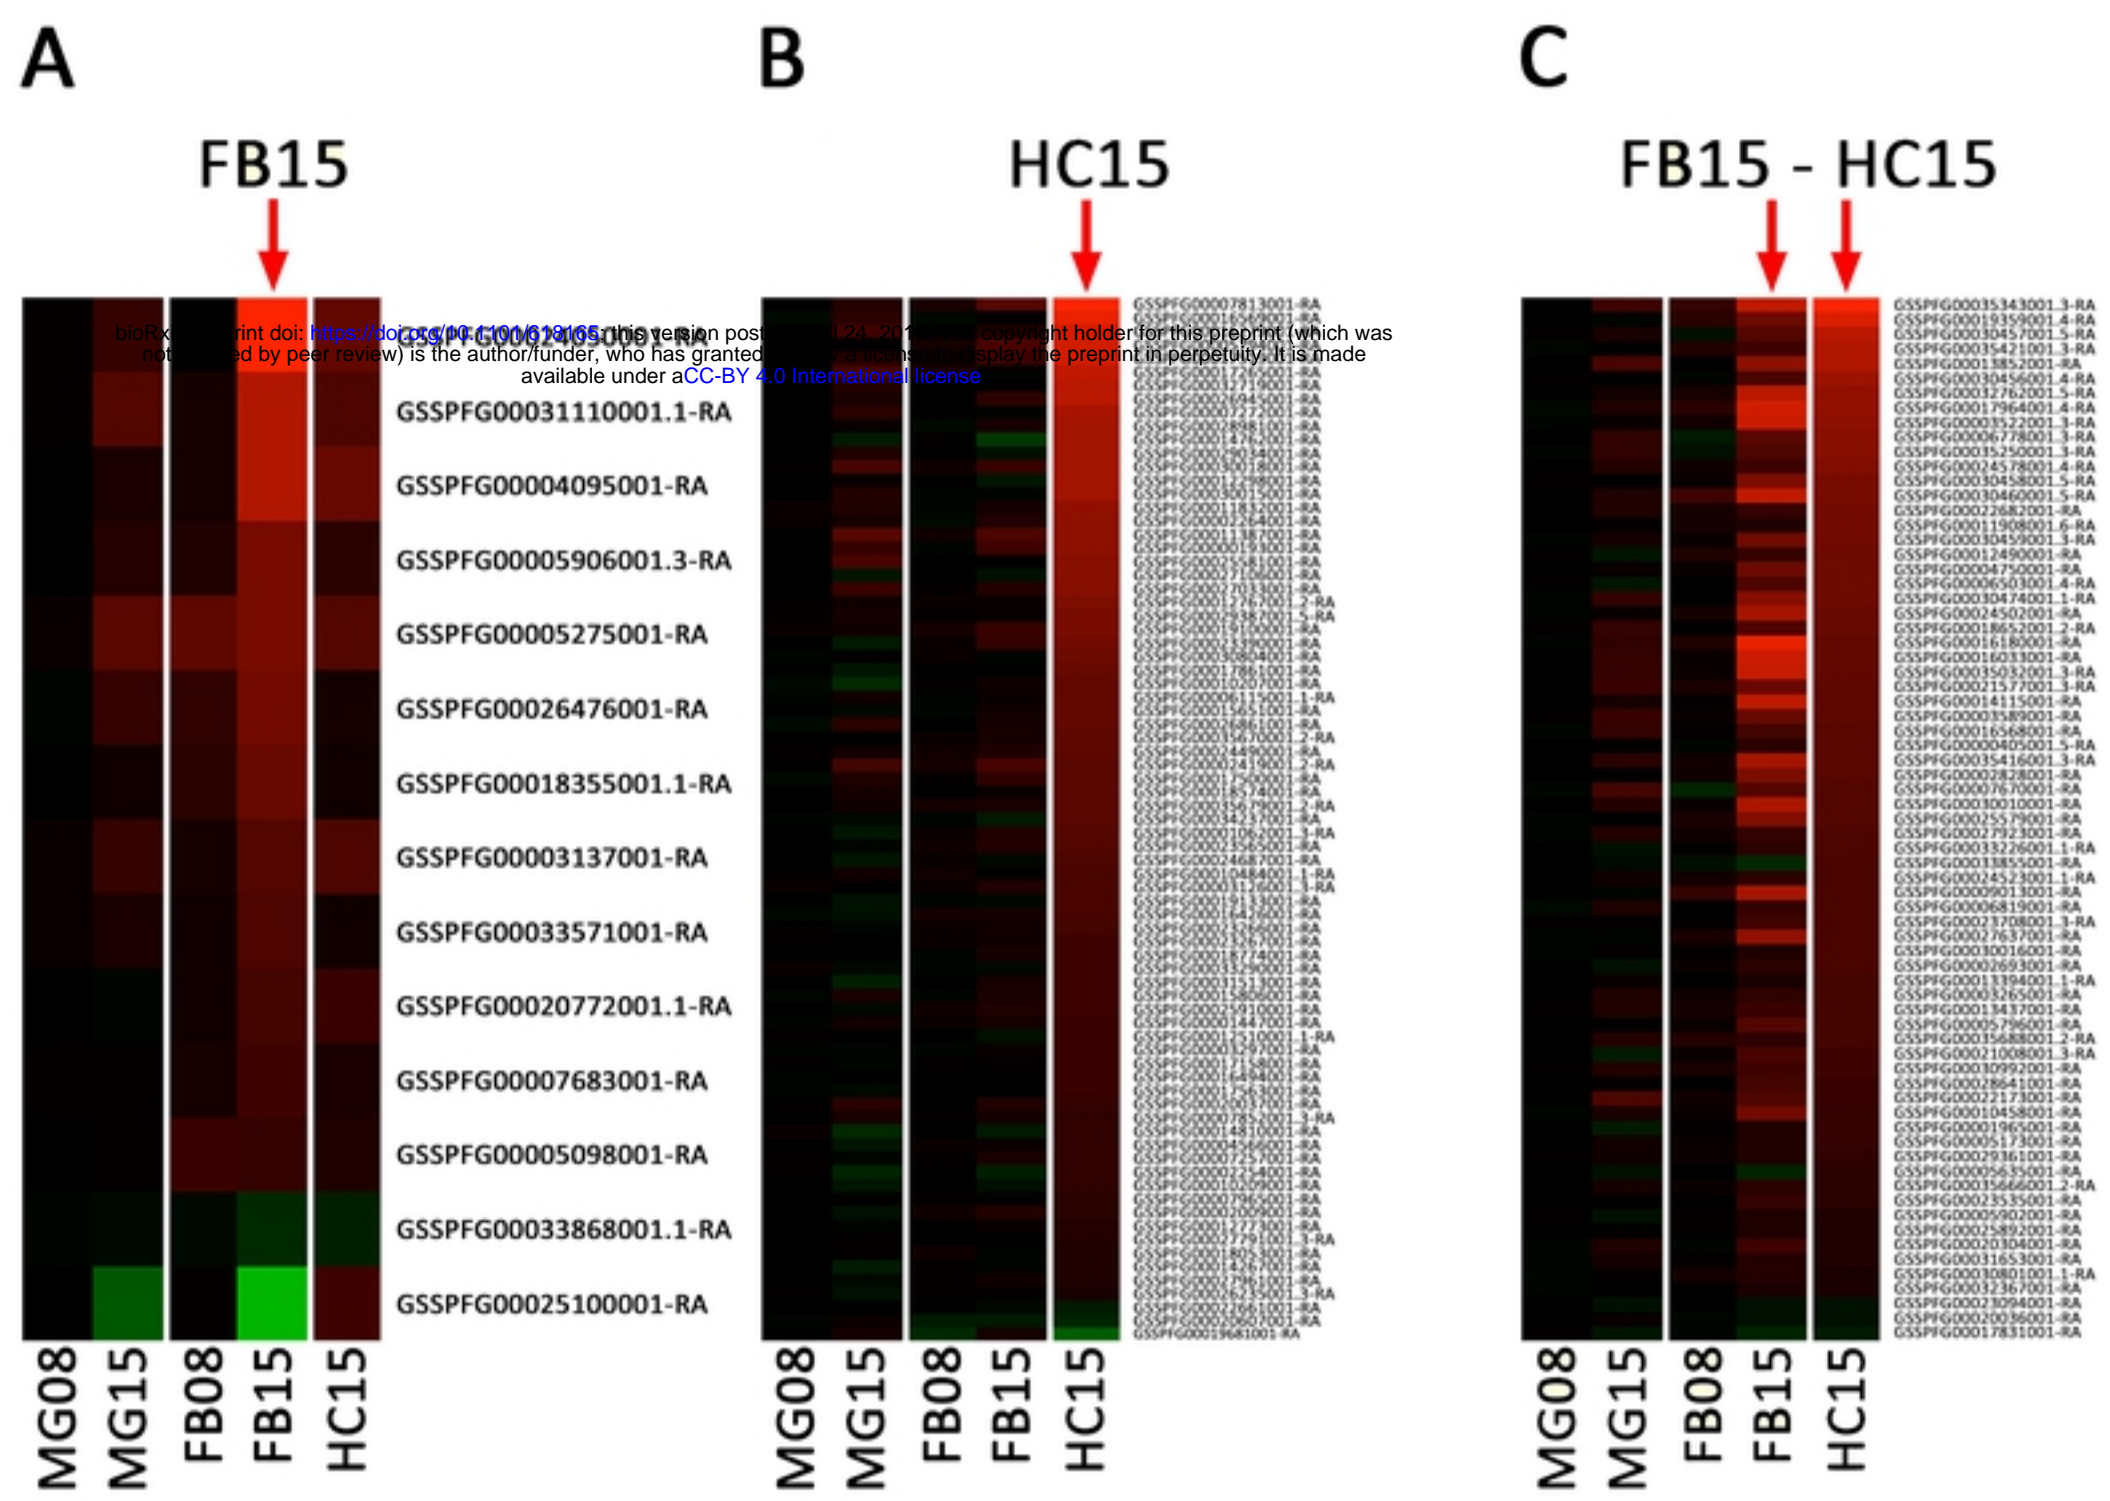

Figure 3

Fig 4

bioRxiv preprint doi: <https://doi.org/10.1101/618165>; this version posted April 24, 2019. The copyright holder for this preprint (which was not certified by peer review) is the author/funder, who has granted bioRxiv a license to display the preprint in perpetuity. It is made available under aCC-BY 4.0 International license.

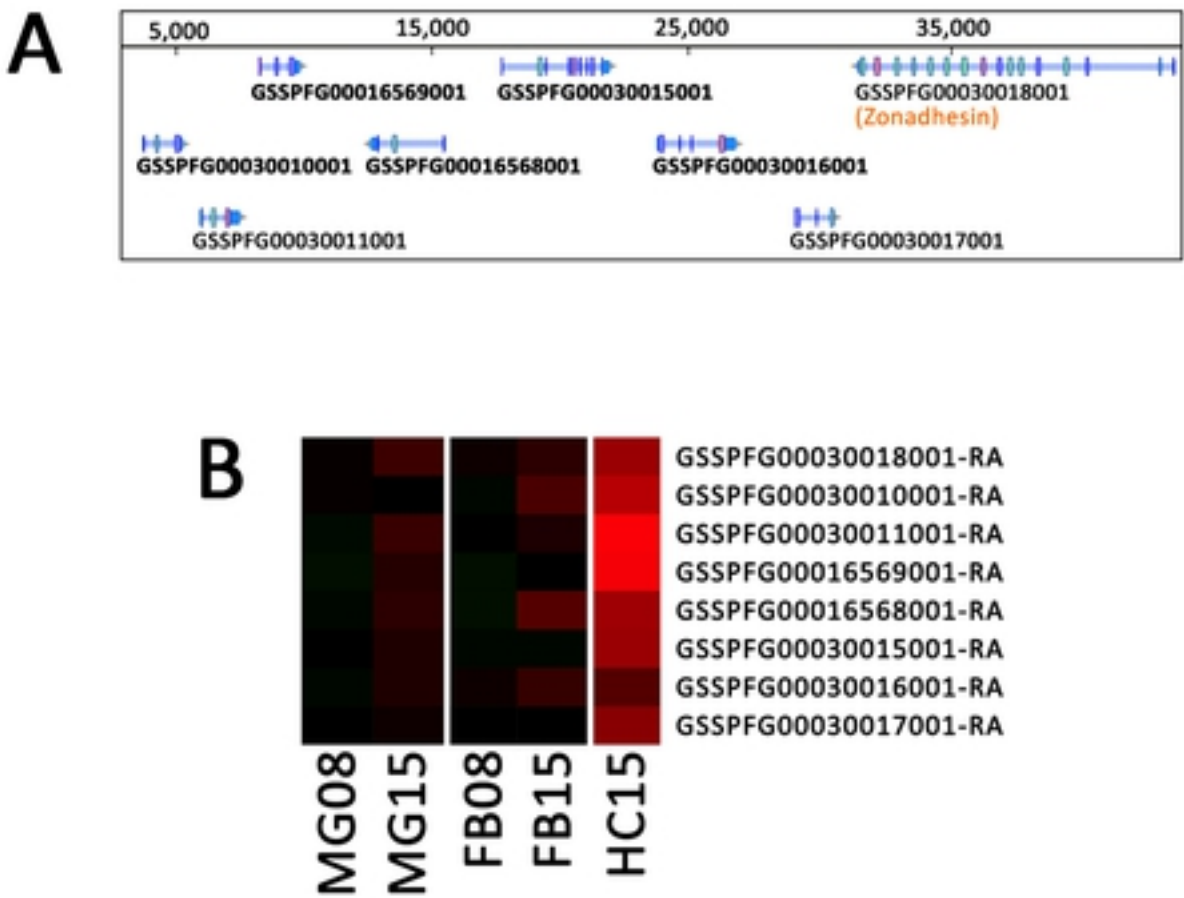

Figure 4

Fig 5

A

MG15 - FB15 - HC15

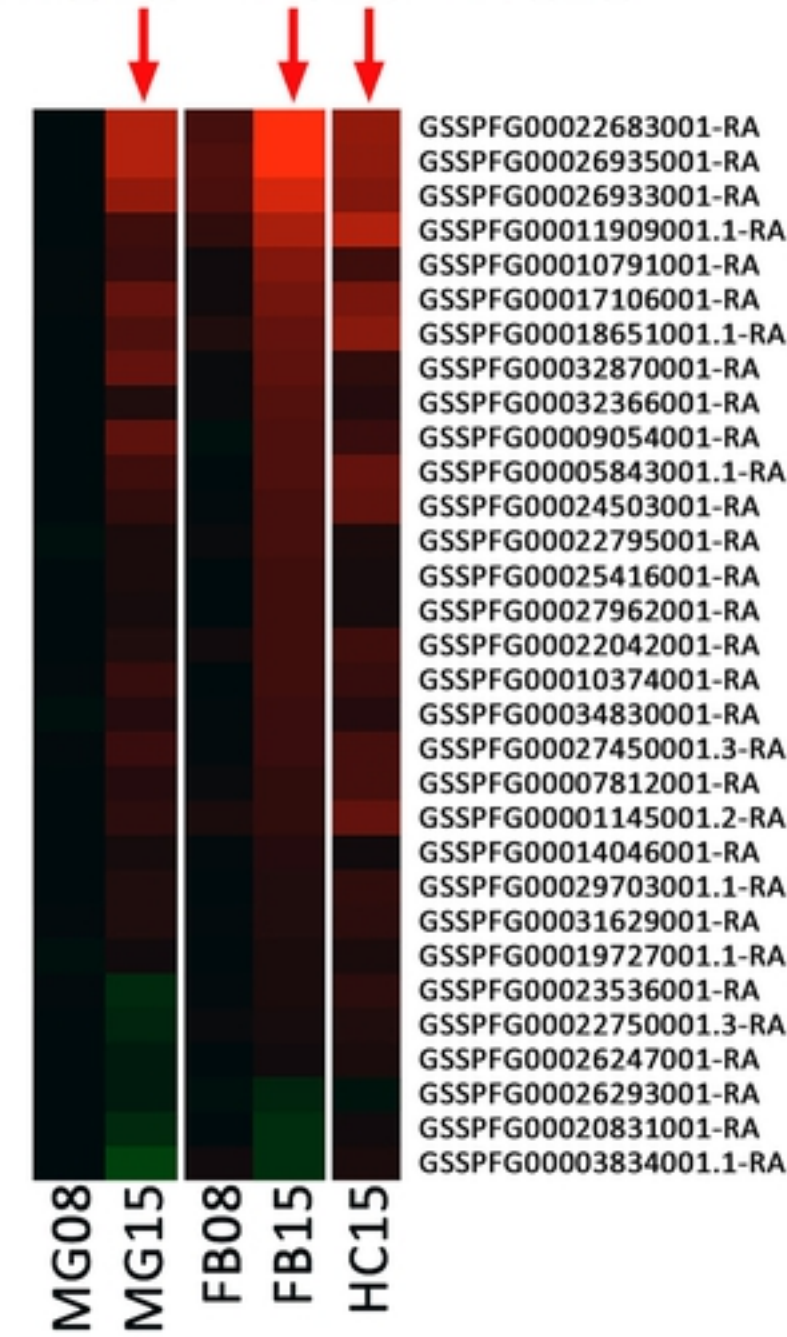

B

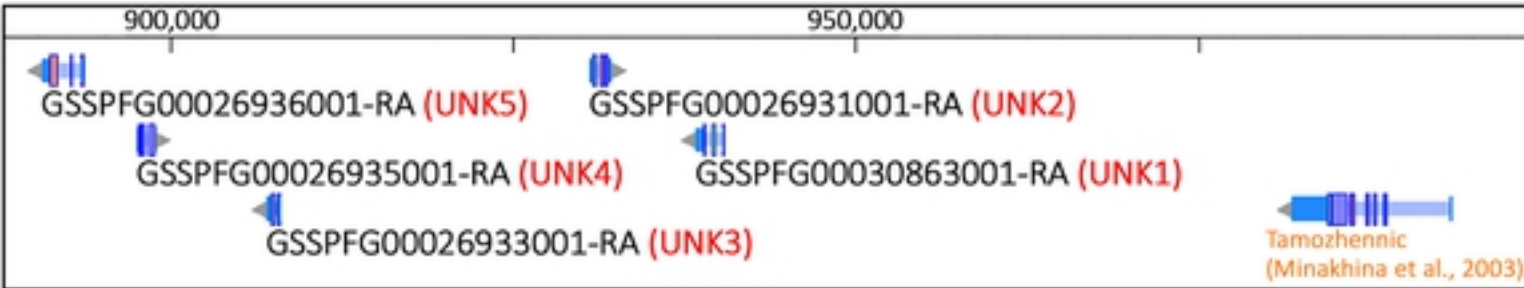

C

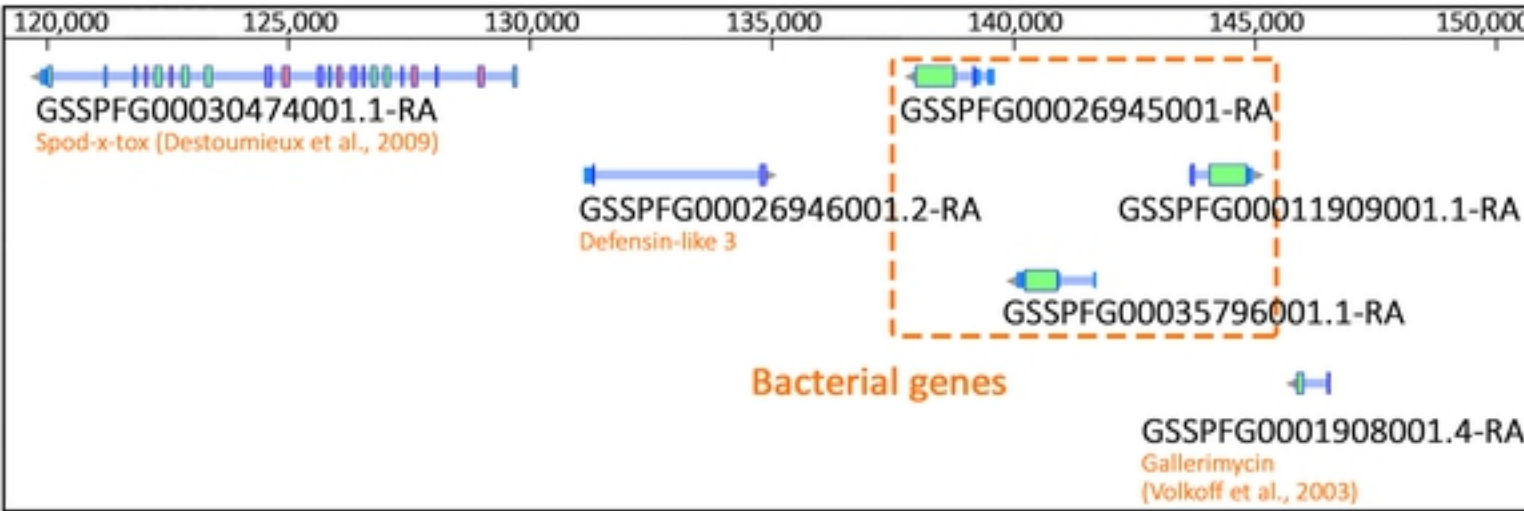

Figure 5
